# Supplementary material for: A novel type of N-formylation and related reactions of amines via cyanides and esters as formylating agents
Source: Royal Society of Chemistry journal article supplement (doi:10.1039/b810086a), 2008-01-01

Supplementary Information for

***N*-Formylation and Related Reactions of Amines *via* Umpolung of  
Cyanide Ion Promoted by Esters**

**Kai Bao, Weige Zhang,\* Xiujuan Bu, Zhichun Song, Liang Zhang and Maosheng Cheng \***  
*School of Pharmaceutical Engineering, Shenyang Pharmaceutical University,  
Shenyang 116616, China*

Contents:

|                                                                                |   |
|--------------------------------------------------------------------------------|---|
| General Information . . . . .                                                  | 1 |
| General Procedure for the <i>N</i> -Formylation and Related Reactions. . . . . | 2 |
| Characterization Data for the Products. . . . .                                | 2 |
| References for melting points. . . . .                                         | 7 |
| <sup>1</sup> H and <sup>13</sup> C Spectra. . . . .                            | 8 |

**General.**

The moisture content of methanol played an important role in the reaction and affected the yield obviously. Methanol was purchased commercially and used as received (the moisture content was 0.1%). Unless otherwise noted, all the materials were obtained from commercially available sources and were used without purification. Thin-layer chromatography was performed on GF254 silica gel plates to monitor the reaction and the plates were examined under UV light or detected with a solution of phosphomolybdic acid in ethanol (5%). The purification of the products was performed using column chromatography (60 Å, 200-300 mesh, Qingdao Ocean Chemicals) or silica gel plates (0.25mm layer, Qingdao Ocean Chemicals) with the designated solvents. Melting points were measured on a hot-stage microscope (X-4, Beijing Taike Ltd.) and are uncorrected. Mass spectra were obtained on a Waters Quattro Micro API or Agilent 1100 series MSD TRAP using ESI. Elemental analyses were conducted at the Analytical Centre, Jilin University, China. <sup>1</sup>H and <sup>13</sup>C NMR were recorded at 300 or 600 MHz and 75 or 150 MHz respectively on a Bruker ARX-300 and Bruker AVANCE-600 spectrometers with TMS as the internal reference. Chemical shifts were reported in ppm (TM) downfield from tetramethylsilane and proton-proton coupling constants (*J*) in Hz.

## Typical experimental procedure for the *N*-Formylation and related reactions:

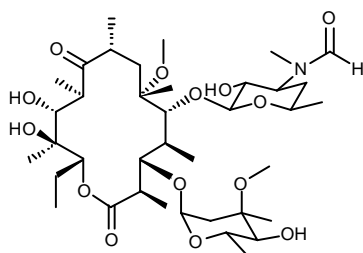

De(*N*-methyl)-*N*-formyl clarithromycin **2a** (known compound, CAS# 127140-69-6)

To a solution of De(*N*-methyl) erythromycin A (0.15 g, 0.20 mmol) in methanol (10 mL) was added potassium cyanide (27mg, 0.41 mmol) and dimethyl malonate (7 $\mu$ L, 0.06mmol). The mixture was stirred at 45°C for 4 h and then refluxed. After 48 hours, the reaction was cooled to room temperature and concentrated. Then poured into Brine, and the aqueous phase was extracted with chloroform and dried over Na<sub>2</sub>SO<sub>4</sub>, evaporated to dryness. The resulting crude product was purified by column chromatography on silica gel eluting with chloroform-methanol-ammonium hydroxide solution (10:0.5:0.01 to 10:1:0.05) to give the title compound (0.12 g, 79%) as a white solid (*cis/trans* 0.8:1), m.p. 121-123 °C; <sup>1</sup>H NMR (CDCl<sub>3</sub>, 600 MHz)  $\delta$  8.12/8.11 (s, 1H), 5.07 (d, 1H, J=11.2, H-13), 4.93 (d, 1H, J=4.2, H-1''), 4.54/4.49 (d, 1H, J=7.3/6.2, H-1'), 4.41 (m, 1H, H-5''), 3.98 (d, 1H, J=13.2, H-3), 3.76/3.71 (s, 3H, 6-OCH<sub>3</sub>), 3.34/3.32 (s, 3H, 3''-OCH<sub>3</sub>), 2.92/2.83 (s, 3H, N-CH<sub>3</sub>); <sup>13</sup>C NMR (CDCl<sub>3</sub>, 150 MHz) 220.7 (C-9), 175.6/175.5 (C-1), 163.8/163.5 (N-CHO), 103.4/102.8 (C-1'), 96.3/96.1 (C-1''), 82.3 (C-5), 81.9 (C-3), 78.7/78.5 (C-4''), 78.24/78.1 (C-13), 77.8/77.7 (C-6), 74.2 (C-12), 73.0 (C-3''), 71.1 (C-2'), 70.5 (C-11), 69.1 (C-5'), 68.4/68.1 (C-3'), 66.1/66.0 (C-5''), 50.6 (6-OCH<sub>3</sub>), 49.5 (3''-OMe), 45.1/45.0 (C-2), 39.2/38.7 (N-Me), 37.3 (C-4), 36.4 (C-7), 35.0/34.9 (C-2''), 31.9 (C-8), 29.7 (C-4'), 25.4 (C-10), 22.7 (6-Me), 21.5/21.5 (5'-Me), 21.1 (3''-Me), 19.7 (C-14), 18.6 (10-Me), 18.0 (5''-Me), 16.1 (2-Me), 15.9 (12-Me), 12.3 (8-Me), 11.0/10.6 (C-15), 9.8/9.6 (4-Me); MS (ESI, *m/z*) 784.8 [M+Na<sup>+</sup>], 800.8 [M+K<sup>+</sup>]. Anal. Calcd. for C<sub>38</sub>H<sub>67</sub>NO<sub>14</sub>: C, 59.90; H, 8.86; N, 1.84. Found: C, 59.76; H, 8.97; N, 1.86. Compounds **2b–2e**, **4a–4f**, were prepared by the same procedure as for **2a**.

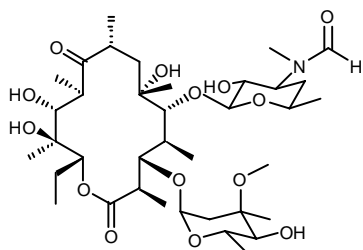

De(*N*-methyl)-*N*-formyl erythromycin A **2b** (known compound, CAS# 127955-44-6)

82% yield; white solid (*cis/trans* 0.7:1), m.p. 106-107 °C; <sup>1</sup>H NMR (CDCl<sub>3</sub>, 600 MHz)  $\delta$  8.12/8.11 (s, 1H), 5.05 (d, 1H, J=10.9, H-13), 4.88 (s, 1H, H-1''), 4.49/4.44 (d, 1H, J=7.4/6.5, H-1'), 4.22 (m, 1H, H-5''), 3.93 (d, 1H, J=9.5, H-3), 3.31/3.30 (s, 3H, 3''-OCH<sub>3</sub>), 2.92/2.83 (s, 3H, N-CH<sub>3</sub>); <sup>13</sup>C NMR (CDCl<sub>3</sub>, 150 MHz) 207.0 (C-9), 175.5 (C-1), 163.8/163.5 (N-CHO), 104.0/103.5 (C-1'), 96.5 (C-1''), 85.5(C-5), 80.2 (C-3), 78.0 (C-4''), 77.8 (C-13), 74.9 (C-6), 74.60 (C-12), 72.8 (C-3''), 71.0 (C-2'), 70.3 (C-11), 69.0 (C-5'), 68.2 (C-3'), 65.8 (C-5''), 49.4 (3''-OMe), 45.0 (C-2), 38.7/38.6 (N-Me), 38.1 (C-4), 36.4 (C-7), 34.9 (C-2''), 31.9 (C-8), 29.7 (C-4'), 26.7 (6-Me), 25.4 (C-10), 23.0 (5'-Me), 21.5 (3''-Me), 21.0 (C-14), 18.5 (10-Me), 18.3 (5''-Me), 16.3 (2-Me), 16.0 (12-Me), 14.1 (8-Me), 10.7 (C-15), 9.8 (4-Me); MS (ESI, *m/z*) 770.9 [M+Na<sup>+</sup>], 786.8 [M+K<sup>+</sup>]. Anal. Calcd. for C<sub>37</sub>H<sub>65</sub>NO<sub>14</sub>: C, 59.42; H, 8.76; N, 1.87. Found: C, 59.35; H, 8.72; N, 1.77.

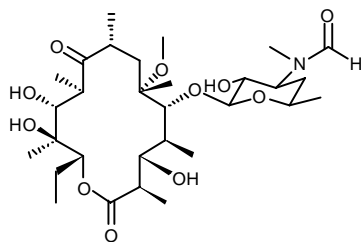

**3-Decladinoside de(*N*-methyl)-*N*-formyl clarithromycin **2c****

70% yield; white solid (*cis/trans* 0.6:1), m.p. 265-267 °C; <sup>1</sup>H NMR (CDCl<sub>3</sub>, 600 MHz) δ 8.11/8.09 (s, 1H), 5.17 (dd, 1H, J=9.3,1.7, H-13), 4.54/4.50 (d, 1H, J=7.3/7.0, H-1'), 4.43 (m, 1H, H-5''), 3.83/3.75 (s, 3H, 6-OCH<sub>3</sub>), 3.26 (s, 3H, 3''-OCH<sub>3</sub>), 2.91/2.81 (s, 3H, N-CH<sub>3</sub>); <sup>13</sup>C NMR (CDCl<sub>3</sub>, 150 MHz) 220.5 (C-9), 174.7 (C-1), 164.0/163.6 (N-CHO), 104.7/104.3 (C-1'), 86.1/85.8 (C-5), 78.7 (C-3), 78.7 (C-13), 77.9 (C-6), 77.0 (C-12), 74.2 (C-2'), 70.7 (C-11), 70.0/69.8 (C-5'), 69.2/69.0 (C-3'), 53.0 (6-OCH<sub>3</sub>), 49.7 (3''-OMe), 45.5/44.2 (C-2), 38.8/37.5 (N-Me), 36.4 (C-4), 35.6/35.0 (C-7), 30.3 (C-8), 29.7 (C-4'), 25.5 (C-10), 21.4 (6-Me), 21.1 (5'-Me), 20.9/20.9 (C-14), 19.0 (10-Me), 17.9 (2-Me), 16.2 (12-Me), 12.7 (8-Me), 10.5 (C-15), 8.4 (4-Me); MS (ESI, m/z) 626.3 [M+Na<sup>+</sup>]. Anal. Calcd. for C<sub>30</sub>H<sub>53</sub>NO<sub>11</sub>: C, 59.68; H, 8.85; N, 2.32. Found: C, 59.59; H, 8.77; N, 2.37.

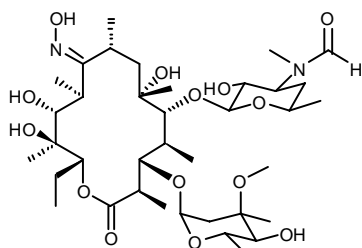

**De(*N*-methyl)-*N*-formyl-9(*E*)-oxime erythromycin A **2d****

69% yield; white solid (*cis/trans* 0.7:1), m.p. 147-149 °C; <sup>1</sup>H NMR (CDCl<sub>3</sub>, 600 MHz) δ 8.12/8.11 (s, 1H), 5.05 (d, 1H, J=21.6, H-13), 4.91 (d, 1H, H-1''), 4.49/4.42 (d, 1H, J=14.5, H-1'), 4.02 (m, 1H, H-5''), 3.94 (d, 1H, J=19.5, H-3), 3.31/3.30 (s, 3H, 3''-OCH<sub>3</sub>), 2.92/2.83 (s, 3H, N-CH<sub>3</sub>); <sup>13</sup>C NMR (CDCl<sub>3</sub>, 150 MHz) 175.2 (C-1), 171.2 (C-9), 163.9/163.6 (N-CHO), 104.0/103.4 (C-1'), 96.6/96.5 (C-1''), 85.7/85.4 (C-5), 80.8 (C-3), 80.6 (C-4''), 78.00 (C-13), 77.9 (C-13), 77.4/(C-6), 74.4 (C-12), 72.9 (C-3''), 71.1 (C-2'), 70.4 (C-11), 68.6/68.3 (C-5'), 65.6 (C-3'), 65.5 (C-5''), 49.5 (3''-OMe), 44.8 (C-2), 38.6 (N-Me), 37.8 (C-4), 36.4 (C-7), 35.3/35.2 (C-2''), 32.7 (C-8), 29.7 (C-4'), 26.7 (C-10), 25.5/25.4 (6-Me), 21.5 (3''-Me), 21.1 (5'-Me), 21.0 (C-14), 18.7 (10-Me), 18.5/18.5 (5''-Me), 16.4 (2-Me), 16.3 (12-Me), 14.4 (8-Me), 10.7 (C-15), 9.8/9.7 (4-Me); MS (ESI, m/z) 763.3 [M+H<sup>+</sup>], 785.3 [M+Na<sup>+</sup>], 1547.2 [2M+Na<sup>+</sup>]. Anal. Calcd. for C<sub>37</sub>H<sub>66</sub>N<sub>2</sub>O<sub>14</sub>: C, 58.25; H, 8.72; N, 3.67. Found: C, 58.10; H, 8.55; N, 3.53.

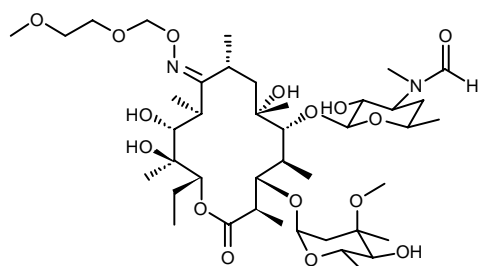

**De(*N*-methyl)-*N*-formyl roxithromycin **2e****

65% yield; white solid (*cis/trans* 0.6:1), m.p. 99-102 °C; <sup>1</sup>H NMR (CDCl<sub>3</sub>, 600 MHz) δ 8.12/8.10 (s, 1H), 5.19 (s, 2H, CH<sub>2</sub>OCH<sub>2</sub>CH<sub>2</sub>OCH<sub>3</sub>), 5.11 (d, 1H, J=18, H-13), 4.88 (d, 1H, J=9, H-1''), 4.49/4.42 (d,

1H, J=14.9/13.3, H-1'), 4.02 (m, 1H, H-5''), 3.90 (d, 1H, J=20.0, H-3), 3.81 (t, 2H, CH<sub>2</sub>OCH<sub>2</sub>CH<sub>2</sub>OCH<sub>3</sub>), 3.73 (m, 2H, CH<sub>2</sub>OCH<sub>2</sub>CH<sub>2</sub>OCH<sub>3</sub>), 3.43 (s, 3H, CH<sub>2</sub>OCH<sub>2</sub>CH<sub>2</sub>OCH<sub>3</sub>), 3.32/3.30 (s, 3H, 3''-OCH<sub>3</sub>), 2.92/2.83 (s, 3H, N-CH<sub>3</sub>); <sup>13</sup>C NMR (CDCl<sub>3</sub>, 150 MHz) 175.0/174.9 (C-1), 172.4 (C-9), 163.8/163.5 (N-CHO), 103.8/103.3 (C-1'), 97.5 (CH<sub>2</sub>OCH<sub>2</sub>CH<sub>2</sub>OCH<sub>3</sub>), 96.4/96.3 (C-1''), 85.7/85.6 (C-5), 80.5/80.4 (C-3), 77.9/77.8 (C-4''), 76.9 (C-13), 74.7/74.6 (C-6), 74.3 (C-12), 72.9 (C-3''), 71.9 (C-2'), 71.0 (CH<sub>2</sub>OCH<sub>2</sub>CH<sub>2</sub>OCH<sub>3</sub>), 70.4 (C-11), 68.5 (CH<sub>2</sub>OCH<sub>2</sub>CH<sub>2</sub>OCH<sub>3</sub>), 68.3/68.3 (C-5'), 65.6 (C-3'), 65.4 (C-5''), 59.1/59.1 (CH<sub>2</sub>OCH<sub>2</sub>CH<sub>2</sub>OCH<sub>3</sub>), 49.4 (3''-OMe), 44.8 (C-2), 38.6/37.5 (N-Me), 37.4 (C-4), 36.4 (C-7), 35.2/34.9 (C-2''), 31.9 (C-8), 29.7 (C-4'), 25.4 (C-10), 22.7 (6-Me), 1.5 (3''-Me), 21.2 (5'-Me), 21.0 (C-14), 18.7 (10-Me), 18.5/18.4 (5''-Me), 16.2 (2-Me), 14.8 (12-Me), 14.1 (8-Me), 10.6 (C-15), 9.8/9.6 (4-Me); MS (ESI, m/z) 851.9 [M+H<sup>+</sup>], 873.9 [M+Na<sup>+</sup>]. Anal. Calcd. for C<sub>41</sub>H<sub>74</sub>N<sub>2</sub>O<sub>16</sub>: C, 57.86; H, 8.76; N, 3.29. Found: C, 57.80; H, 8.68; N, 3.43.

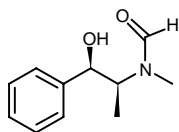

(1R, 2S)-*N*-Formylephedrine **4a** (known compound, CAS# 1630-35-9)

83% yield; pale yellow viscous liquid (*cis/trans* 0.6:1); <sup>1</sup>H NMR (CDCl<sub>3</sub>, 300 MHz) δ 7.82/7.66 (s, 1H, -CHO), 7.23-7.33 (m, 5H, ArH), 4.84/4.58 (d, 1H, J=3.5/6.5, -CH(OH)-), 4.26/3.60 (m, 1H, -CH-CH<sub>3</sub>), 4.08/3.83 (bs, 1H, -OH), 2.78/2.67 (s, 3H, -NCH<sub>3</sub>), 1.32/1.18 (d, 3H, J=6.8/7.1, -CH-CH<sub>3</sub>); MS (ESI, m/z) 194.2 [M+H<sup>+</sup>], 216.2 [M+Na<sup>+</sup>], 409.3 [2M+Na<sup>+</sup>], 192.2 [M-H<sup>+</sup>], 228.2 [M+Cl<sup>-</sup>]. Anal. Calcd. for C<sub>11</sub>H<sub>15</sub>NO<sub>2</sub>: C, 68.37; H, 7.82; N, 7.25. Found: C, 68.22; H, 7.91; N, 7.03.

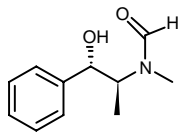

(1S, 2S)-*N*-Formylpseudoephedrine **4b** (known compound, CAS# 55123-97-2)

57% yield; white solid (*cis/trans* 0.6:1), m.p. 105-106 °C; <sup>1</sup>H NMR (CDCl<sub>3</sub>, 300 MHz) δ 8.11/8.05 (s, 1H, -CHO), 7.27-7.36 (m, 5H, -ArH), 4.69/4.60 (d, 1H, J=7.7/8.3, -CH(OH)-), 4.32/3.68 (m, 1H, -CH-CH<sub>3</sub>), 2.77 (bs, 1H, -OH), 2.90/2.84 (s, 3H, -NCH<sub>3</sub>), 1.16/1.07 (d, 3H, J=4.1/2.9, -CH-CH<sub>3</sub>); MS (ESI, m/z) 194.3 [M+H<sup>+</sup>], 216.3 [M+Na<sup>+</sup>], 387.3 [2M+H<sup>+</sup>], 192.0 [M-H<sup>+</sup>]. Anal. Calcd. for C<sub>11</sub>H<sub>15</sub>NO<sub>2</sub>: C, 68.37; H, 7.82; N, 7.25. Found: C, 68.31; H, 8.04; N, 7.33.

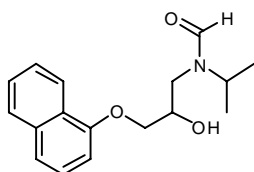

(±)-*N*-formylpropranolol **4c** (known compound, CAS# 77252-87-0)

62% yield; colorless oil; <sup>1</sup>H NMR (CDCl<sub>3</sub>, 300 MHz) δ 8.28 (s, 1H, -CHO), 8.21 (dd, 1H, J=6.9, 2.6, -ArH8), 7.81 (dd, 1H, J=6.6, 2.6, -ArH5), 7.47-7.51 (m, 2H, -ArH6, -ArH7), 7.46 (d, 1H, J=9.0, -ArH4), 7.38 (t, 1H, J=7.6, -ArH3), 6.86 (d, 1H, J=7.5, -ArH2), 4.90 (bs, 1H, -OH), 4.28-4.29 (m, 1H, -CH<sub>2</sub>-CH(OH)-CH<sub>2</sub>-), 4.24 (dd, 1H, J=10.4, 5.4, -O-CH<sub>2</sub>-CH(OH)-), 4.07 (dd, 1H, J=9.0, 7.4, -O-CH<sub>2</sub>-CH(OH)-), 3.88 (m, 1H, -N-CH(CH<sub>3</sub>)<sub>2</sub>), 3.66 (d, 1H, J=7.0, -CH(OH)-CH<sub>2</sub>-N-), 3.61 (dd, 1H, J=15.1, 5.1, -CH(OH)-CH<sub>2</sub>-N-), 1.34 (d, 3H, J=6.7, -CH(CH<sub>3</sub>)<sub>2</sub>), 1.27 (d, 3H, J=7.1, -CH(CH<sub>3</sub>)<sub>2</sub>); MS (ESI, m/z) 322.1 [M+Cl<sup>-</sup>]. Anal. Calcd. for C<sub>17</sub>H<sub>21</sub>NO<sub>3</sub>: C, 71.06; H, 7.37; N, 4.87. Found: C, 71.02; H, 7.15; N, 4.78.

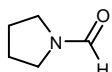

*N*-Formylpyrrolidine **4d** (known compound, CAS# 3760-54-1)

60% yield; colorless oil; <sup>1</sup>H NMR (CDCl<sub>3</sub>, 300 MHz) δ 8.27(1 H, s, -CHO), 3.49 (t, 2H, J=8.5, -N-CH<sub>2</sub>-), 3.43 (t, 2 H, J=6.3, -NCH<sub>2</sub>-), 1.88-1.95 (m, 4H, -CH<sub>2</sub>-CH<sub>2</sub>-); MS (ESI, m/z) 100.3 [M+H<sup>+</sup>], 122.3 [M+Na<sup>+</sup>].

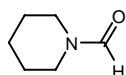

*N*-Formylpiperidine **4e** (known compound, CAS# 2591-86-8)

66% yield; colorless oil; <sup>1</sup>H NMR (CDCl<sub>3</sub>, 300 MHz) δ 8.01(1 H, s, -CHO), 3.48 (t, 2 H, J=5.7, -NCH<sub>2</sub>-), 3.31 (t, 2 H, J=5.4, -NCH<sub>2</sub>-), 1.65-1.69 (m, 2H, -CH<sub>2</sub>-), 1.52-1.60 (m, 4H, -CH<sub>2</sub>-CH<sub>2</sub>-); MS (ESI, m/z) 114.3 [M+H<sup>+</sup>], 136.3 [M+Na<sup>+</sup>].

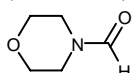

*N*-Formylmorpholine **4f** (known compound, CAS# 4394-85-8)

55% yield; white solid, m.p. 21-23 °C (lit., <sup>1</sup> 20–21 °C); <sup>1</sup>H NMR (CDCl<sub>3</sub>, 600 MHz) δ 8.07 (s, 1H, -CHO), 3.69/3.67 (t, 2H, J=4.9/4.7, -CH<sub>2</sub>-O-), 3.59/3.40 (t, 2H, J=5.0, -CH<sub>2</sub>-N-); MS (ESI, m/z) 116.3 [M+H<sup>+</sup>], 138.3 [M+Na<sup>+</sup>], 154.2 [M+K<sup>+</sup>].

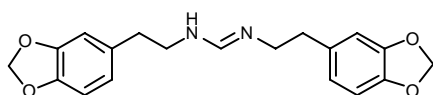

(*E*)-*N,N'*-Bis(2-(benzo[*d*][1,3]dioxol-5-yl)ethyl)formamidinium **6a**

Typical procedure: To a solution of 2-(3,4-Methylenedioxyphenyl)ethylamine (0.81 mL, 6.09 mmol) in methanol (50 mL), potassium cyanide (0.79g, 12.18 mmol) and dimethyl malonate (0.21mL, 1.83mmol) were added. The mixture was stirred at 45°C for 4 h and then refluxed for 48 h. After the mixture was cooled to room temperature and concentrated to dryness, the residual solid was washed with ethyl acetate (3×25mL), and the combined extracts were dried (Na<sub>2</sub>SO<sub>4</sub>), filtered, and evaporated in *vacuo*. Recrystallization from methanol gave 0.58 g (56% yield) of the title compound as a white solid. m.p. 149-150 °C; <sup>1</sup>H NMR (CDCl<sub>3</sub>, 300 MHz) δ 6.59-6.75 (m, 6H, -ArH), 5.94/5.93 (s, 2H, -OCH<sub>2</sub>-O-), 3.37 (t, 2H, J=6.7, -CH<sub>2</sub>-N-), 2.76 (t, 2H, J=6.7, -CH<sub>2</sub>-Ar); <sup>13</sup>C NMR (CDCl<sub>3</sub>, 75 MHz) 161.1(-NH-CH=N-), 147.8, 147.6, 146.4, 146.1, 131.7, 131.2, 122.1, 121.6, 109.2, 109.0, 108.4, 108.2, 101.0 (-OCH<sub>2</sub>-O-), 100.8 (-OCH<sub>2</sub>-O-), 39.7, 39.3, 36.3, 35.2; MS (ESI, m/z) 341.3 [M+H<sup>+</sup>], 339.1 [M-H<sup>+</sup>], 375.0 [M+Cl<sup>-</sup>]. Anal. Calcd. for C<sub>19</sub>H<sub>20</sub>N<sub>2</sub>O<sub>4</sub>: C, 67.05; H, 5.92; N, 8.23. Found: C, 66.91; H, 5.94; N, 8.16. Compounds **6b–6e** were prepared by the same procedure as for **6a**.

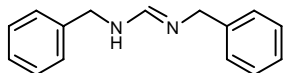

(*E*)-*N,N'*-Dibenzylformamidinium **6b** (known compound, CAS# 4636-51-5)

70% yield; white solid, m.p. 135-137 °C (lit., <sup>2</sup> 136–137 °C); <sup>1</sup>H NMR (CDCl<sub>3</sub>, 300 MHz) δ 7.54 (s, 1H, -N=CH-), 7.23-7.35 (m, 10H, -Ar), 4.43 (s, 4H, -CH<sub>2</sub>-Ar); MS (ESI, m/z) 225.3 [M+H<sup>+</sup>].

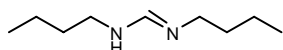

(*E*)-*N,N'*-Dibutylformamidinium **6c** (known compound, CAS# 2303-94-8)

77% yield; colorless oil; <sup>1</sup>H NMR (CDCl<sub>3</sub>, 300 MHz) δ 7.31 (s, 1H, -N=CH-), 3.21-3.28 (m, 4H, -CH<sub>2</sub>-N-), 1.29-1.41, 1.45-1.55 (m, 8H, -CH<sub>2</sub>-), 0.92 (t, 6H, J=7.2, -CH<sub>3</sub>);

MS (ESI, m/z) 157.3 [M+H<sup>+</sup>]. Anal. Calcd. for C<sub>9</sub>H<sub>20</sub>N<sub>2</sub>: C, 69.17; H, 12.90; N, 17.93. Found: C, 69.05; H, 12.98; N, 17.91.

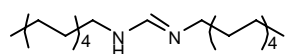

(*E*)-*N,N'*-Didecylformamidinium **6d** (known compound, CAS# 31815-45-9)

81% yield; white solid, m.p. 48-49 °C; <sup>1</sup>H NMR (CDCl<sub>3</sub>, 300 MHz) δ 7.32 (s, 1H, -N=CH-), 3.16 (t, 4H, J=6.8, -CH<sub>2</sub>-N-), 1.51 (t, 4H, -CH<sub>2</sub>-CH<sub>2</sub>-N-), 1.26 (m, 28H, -CH<sub>2</sub>-), 0.88 (t, 6H, J=6.0, -CH<sub>3</sub>); MS (ESI, m/z) 325.5 [M+H<sup>+</sup>]. Anal. Calcd. for C<sub>21</sub>H<sub>44</sub>N<sub>2</sub>: C, 77.71; H, 13.66; N, 8.63. Found: C, 77.74; H, 13.63; N, 8.62.

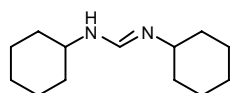

(*E*)-*N,N'*-Dicyclohexylformamidinium **6e** (known compound, CAS# 2303-89-1)

75% yield; white solid, m.p. 99-101 °C (lit.,<sup>3</sup> 102-104 °C); <sup>1</sup>H NMR (CDCl<sub>3</sub>, 300 MHz) δ 7.39 (s, 1H, -N=CH-), 3.02 (bs, 2H, -CH-N-), 1.17-1.80 (m, 20H, -CH<sub>2</sub>-); MS (ESI, m/z) 209.3 [M+H<sup>+</sup>]. Anal. Calcd. for C<sub>13</sub>H<sub>24</sub>N<sub>2</sub>: C, 74.94; H, 11.61; N, 13.45. Found: C, 74.97; H, 11.68; N, 13.41.

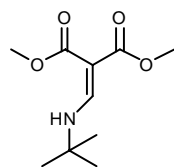

Dimethyl 2-((*tert*-butylamino)methylene)malonate **6f** (known compound, CAS# 73619-78-0)

Potassium cyanide (78 mg, 1.2 mmol) and dimethyl malonate (21 μL, 0.18 mmol) were added to a solution of *t*-Butylamine (63 μL, 0.6 mmol) in methanol (10 mL) and the mixture was stirred at 45 °C for 4 h and refluxed for 48 h. Then the mixture was cooled to room temperature, and concentrated to dryness. The residual solid was washed with ethyl acetate (3 × 20 mL), and then the combined extracts were dried (Na<sub>2</sub>SO<sub>4</sub>), filtered, and evaporated in *vacuo*. The crude product was purified by preparative thin layer chromatography (3:1 Petroleum: EtOAc) to yield title compound as a white solid (57 mg, 44% yield). m.p. 47-50 °C; <sup>1</sup>H NMR (CDCl<sub>3</sub>, 300 MHz) δ 8.16 (d, 1H, J=14.7, -C=CH-N-), 3.79/3.73 (s, 6H, -OCH<sub>3</sub>), 1.36 (s, 9H, -C(CH<sub>3</sub>)<sub>3</sub>); MS (ESI, m/z) 216.3 [M+H<sup>+</sup>], 238.3 [M+Na<sup>+</sup>], 254.3 [M+K<sup>+</sup>]. Anal. Calcd. for C<sub>10</sub>H<sub>17</sub>NO<sub>4</sub>: C, 55.80; H, 7.96; N, 6.51. Found: C, 55.72; H, 7.92; N, 6.54.

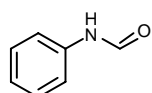

*N*-Phenylformamide **8a** (cis/trans 1:0.9) (known compound, CAS# 103-70-8)

Potassium cyanide (0.78 g, 12 mmol) and dimethyl malonate (0.21 mL, 1.8 mmol) were added to a solution of aniline (0.55 mL, 6 mmol) in methanol (50 mL) and the mixture was stirred at 45 °C for 4 h and then refluxed for 48 h. After the disappearance of aniline (monitored by TLC), H<sub>2</sub>O (8 mL) was added and stirred 3 h at room temperature, and then the reaction was concentrated and poured into Brine, and the aqueous phase was extracted with ethyl acetate and dried over Na<sub>2</sub>SO<sub>4</sub>, evaporated to dryness. Purification by flash chromatography over silica gel (20:1, Petroleum: EtOAc) gave *N*-phenylformamide as a pale brownish solid (0.48 g, 66% yield), m.p. 46 °C (lit.,<sup>4</sup> 45-47 °C); <sup>1</sup>H NMR (CDCl<sub>3</sub>, 300 MHz) δ 8.70 (d, 1H, J=11.4, -CHO *cis*), 8.39 (s, 1H, -CHO, *trans*), 8.10 (1H, -NH-, *cis*), 7.54 (d, 2H, J=7.8, *o*-H, *trans*), 7.31-7.39 (m, 4H, *m*-H), 7.09 (d, 2H, J=7.7, *o*-H, *cis*), 7.14-7.22 (m, 2H, *p*-H); MS (ESI, m/z) 122.3 [M+H<sup>+</sup>], 144.3 [M+Na<sup>+</sup>], 120.1 [M-H<sup>+</sup>]. Compounds **8b-8d** were prepared by the same procedure as for **8a**.

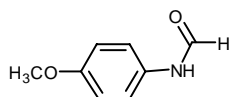

*N*-(4-Methoxyphenyl)formamide **8b** (cis/trans 1:0.9) (known compound, CAS# 5470-34-8)

82% yield; pale brownish solid, m.p. 79-81 °C (lit.,<sup>5</sup> 80–81 °C); <sup>1</sup>H NMR (CDCl<sub>3</sub>, 300 MHz) δ 8.49(d, 1H, J=11.6, -CHO *cis*), 8.34 (s, 1H, -CHO, *trans*), 7.45 (d, 2H, J=8.9, *o*-H, *trans*), 7.03 (d, 2H, J=8.8, *o*-H, *cis*), 6.86-6.91 (m, 4H, *m*-H), 3.80/3.81 (s, 6H, -OCH<sub>3</sub>); MS (ESI, m/z) 152.3 [M+H<sup>+</sup>], 174.2 [M+Na<sup>+</sup>].

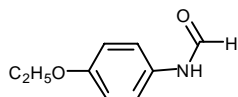

*N*-(4-Ethoxyphenyl)formamide **8c** (cis/trans 1:0.9) (known compound, CAS# 61587-14-2)

85% yield; pale brownish solid, m.p. 56-57 °C; <sup>1</sup>H NMR (CDCl<sub>3</sub>, 300 MHz) δ 8.51(d, 1H, J=11.3, -CHO *cis*), 8.31 (s, 1H, -CHO, *trans*), 8.26 (bs, 1H, -NH-, *cis*), 7.53 (bs, 1H, -NH, *trans*), 7.43 (d, 2H, J=8.9, *o*-H, *trans*), 7.03 (d, 2H, J=8.8, *o*-H, *cis*), 6.83-6.89 (m, 4H, *m*-H), 3.97-4.05 (m, 4H, -OCH<sub>2</sub>-), 1.37-1.44 (m, 6H, -CH<sub>2</sub>-CH<sub>3</sub>); MS (ESI, m/z) 166.3 [M+H<sup>+</sup>], 188.2 [M+Na<sup>+</sup>], 164.0 [M-H<sup>+</sup>]. Anal. Calcd. for C<sub>9</sub>H<sub>11</sub>NO<sub>2</sub>: C, 65.44; H, 6.71; N, 8.48. Found: C, 65.26; H, 6.66; N, 8.32.

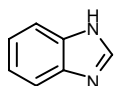

Benzimidazole **8d** (known compound, CAS# 51-17-2)

78% yield; white solid, m.p. 172-173 °C (lit.,<sup>6</sup> 171 °C); <sup>1</sup>H NMR (CDCl<sub>3</sub>, 300 MHz) δ 8.12 (s, 1H, -N=CH-NH-), 7.69 (d, 1H, J=5.7), 7.68 (d, 1H, J=5.6), 7.31(dd, 2H, J=6.0, 3.0); MS (ESI, m/z) 119.3 [M+H<sup>+</sup>], 141.2 [M+Na<sup>+</sup>], 117.1 [M-H<sup>+</sup>], 153.0 [M+Cl<sup>-</sup>].

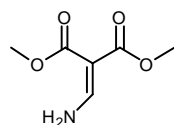

Dimethyl 2-(aminomethylene)malonate **8e** (known compound, CAS# 72179-93-2)

To a solution of dimethyl malonate (44 μL, 0.38mmol) in methanol (10 mL), potassium cyanide (49 mg, 0.76 mmol) was added. The mixture was stirred at 45°C for 3 h and then cooled to room temperature, concentrated to dryness. The residual solid was washed with ethyl acetate (3×20mL), and then the combined extracts were dried (Na<sub>2</sub>SO<sub>4</sub>), filtered, and evaporated to give amide as a pale yellow oil (52 mg, 86% yield); <sup>1</sup>H NMR (CDCl<sub>3</sub>, 300 MHz) δ 8.14 (dd, 1H, J=15.6, 8.4, -C=CH-NH<sub>2</sub>), 7.23-7.35 (m, 10H, -Ar), 4.44 (s, 4H, -CH<sub>2</sub>-Ar); MS (ESI, m/z) 182.2 [M+Na<sup>+</sup>], 341.2 [2M+Na<sup>+</sup>]. Anal. Calcd. for C<sub>6</sub>H<sub>9</sub>NO<sub>4</sub>: C, 45.28; H, 5.70; N, 8.80. Found: C, 45.35; H, 5.61; N, 8.56.

## References for melting points

- 1) G. B. L. Smith, M. Silver and E. I. Becker, *J. Am. Chem. Soc.* **1948**, *70*, 4254-4254.
- 2) C. Kashima, M. Shimizu, T. Eto and Y. Omote, *Bull. Chem. Soc. Jpn.* **1986**, *59*, 3317-3319.
- 3) N. C. Wang and H. J. Anderson, *Can. J. Chem.* **1977**, *55*, 4103-4111.
- 4) N. Iranpoor, H. Firouzabadi and A. Jamalini, *Tetrahedron Lett.* **2005**, *46*, 7963-7966.
- 5) L. D. Nunno and A. Scilimati, *Tetrahedron* **1986**, *42*, 3913-3920.
- 6) J. M. Khurana, G. Kukreja and G. Bansal, *J. Chem. Soc. Perkin Trans.1.* **2002**, *22*, 2520-2524.

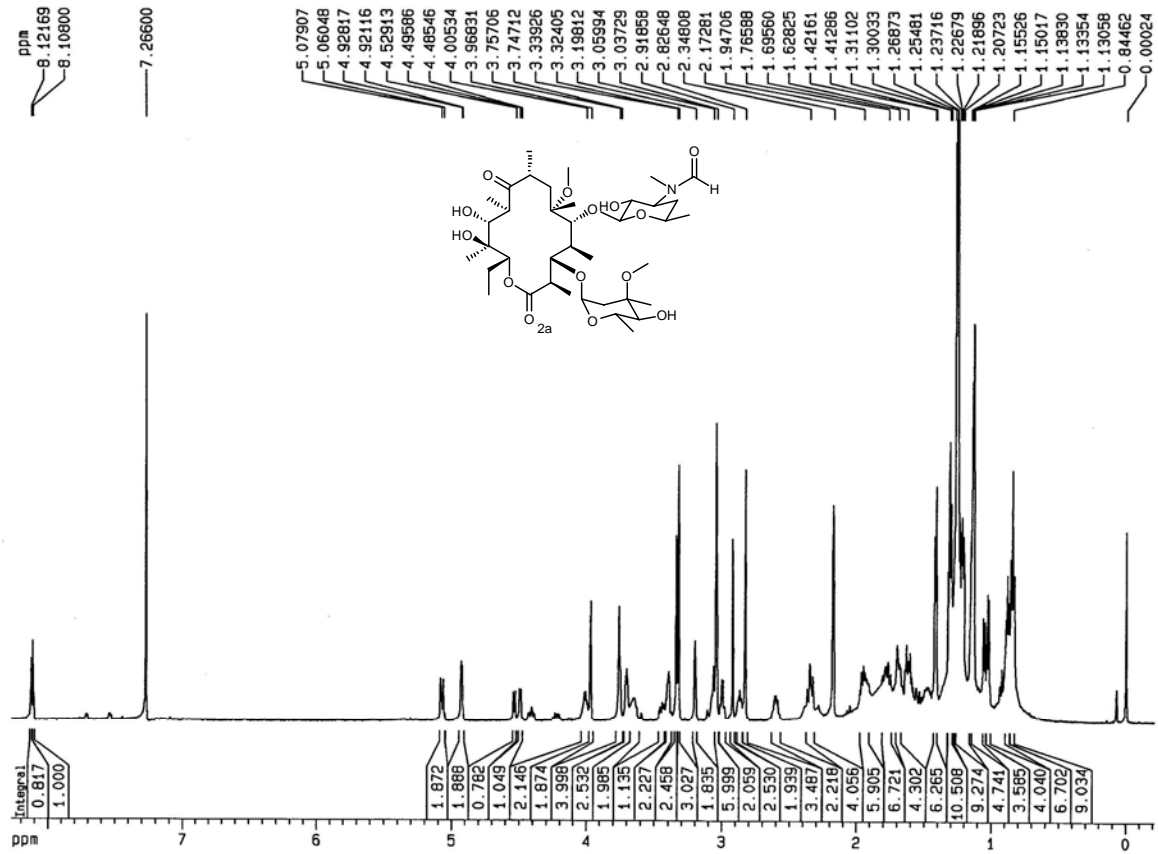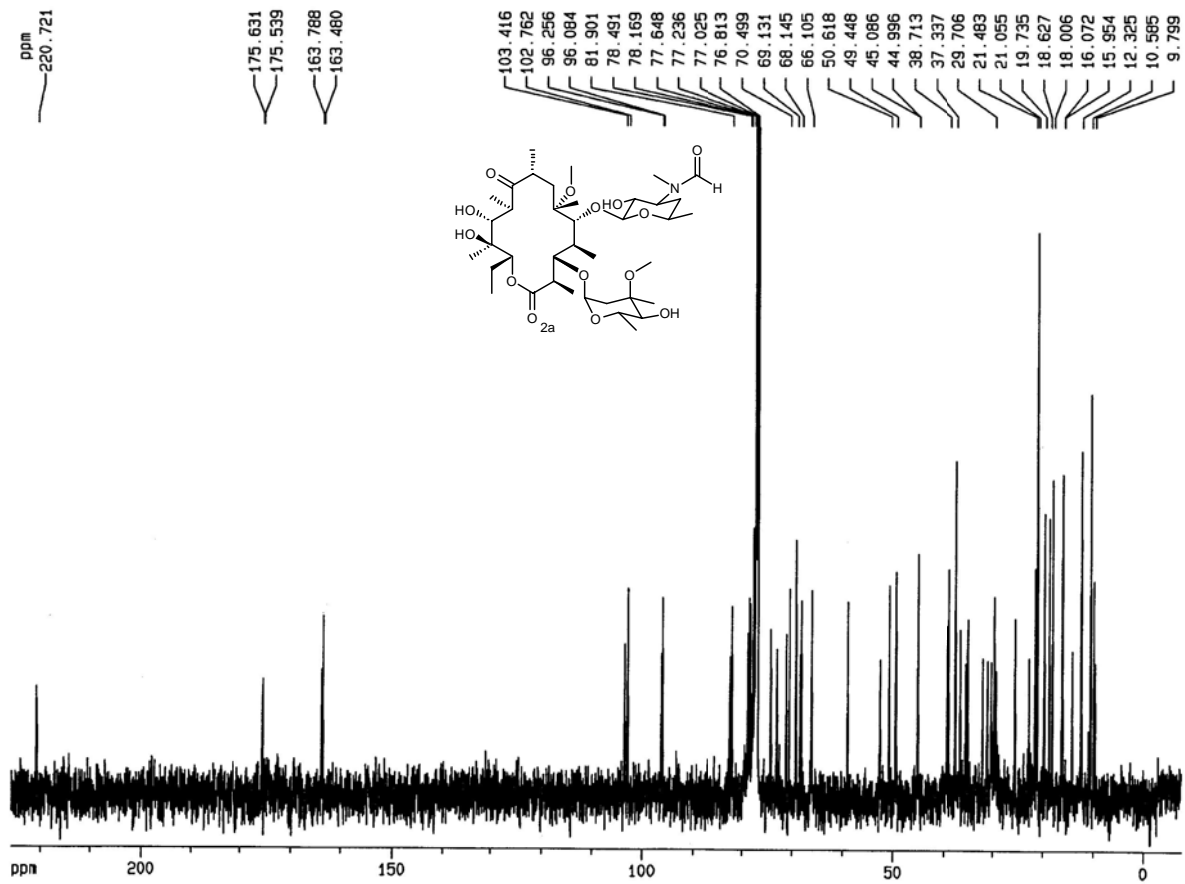



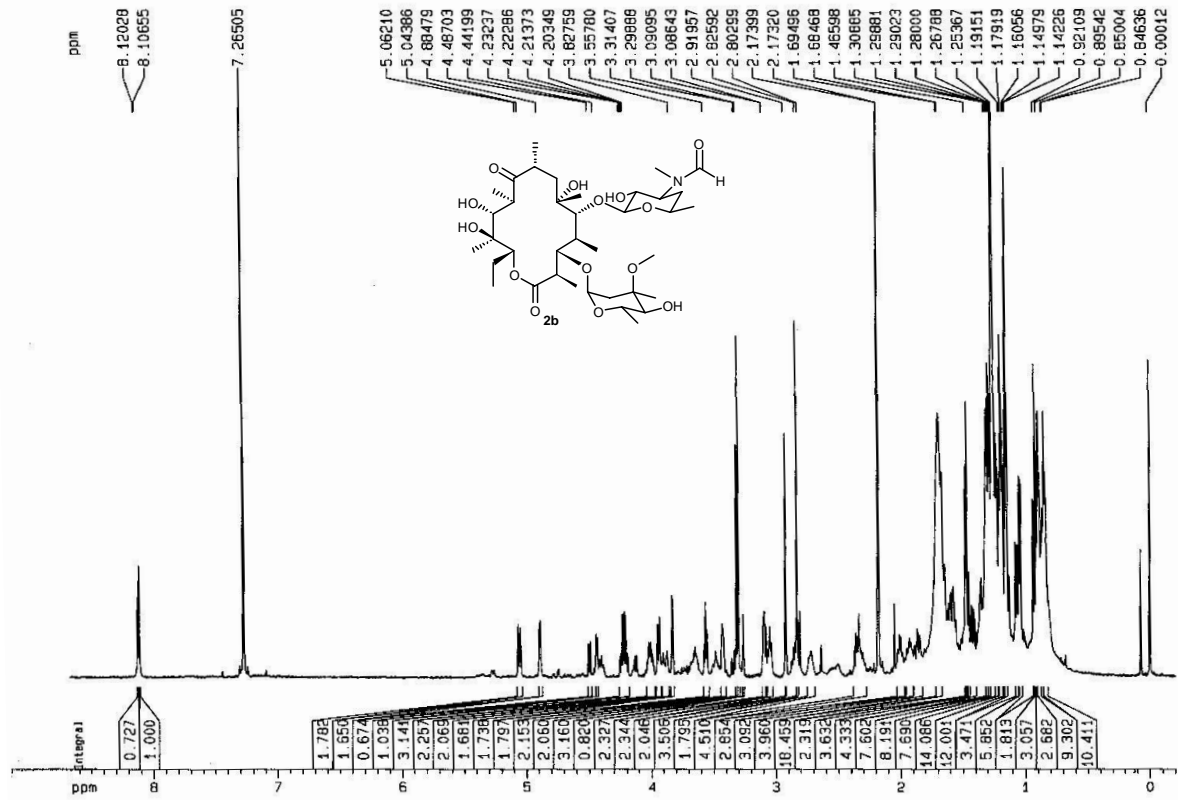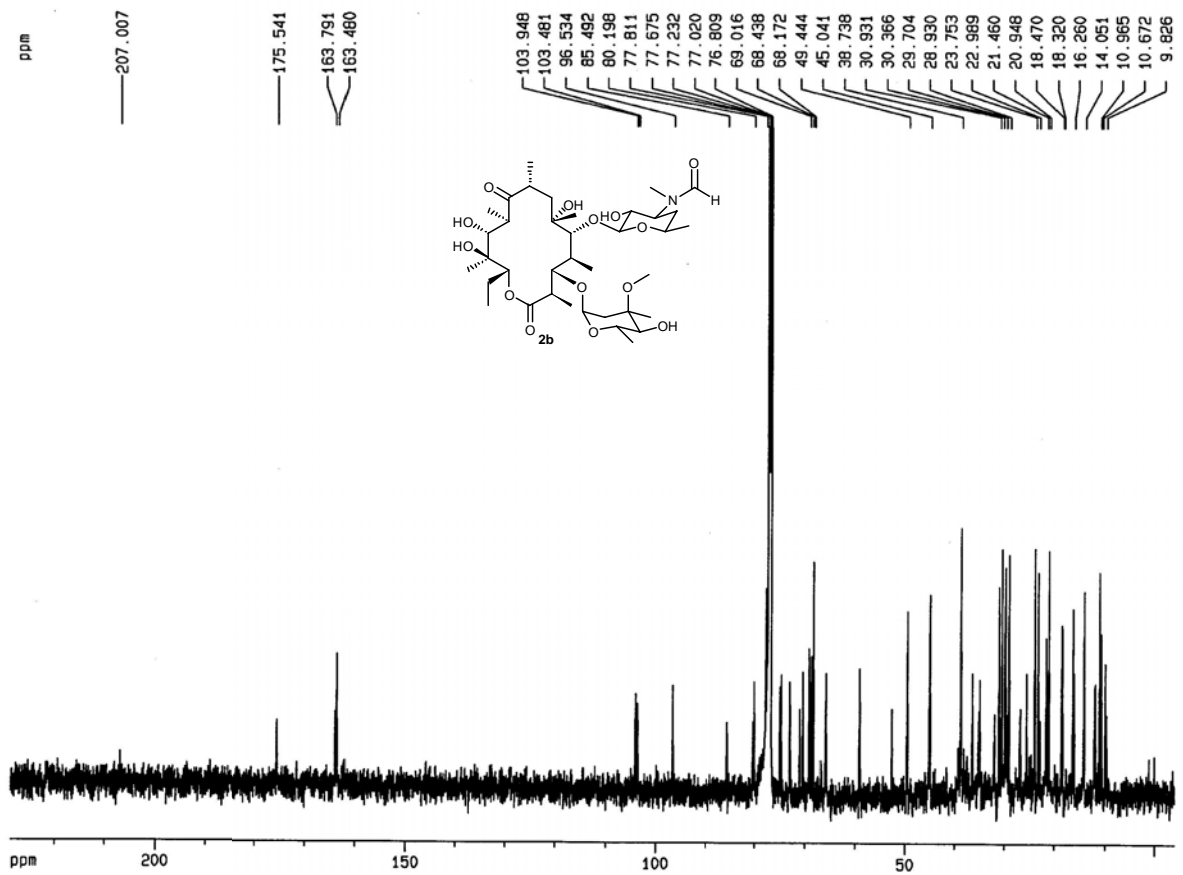



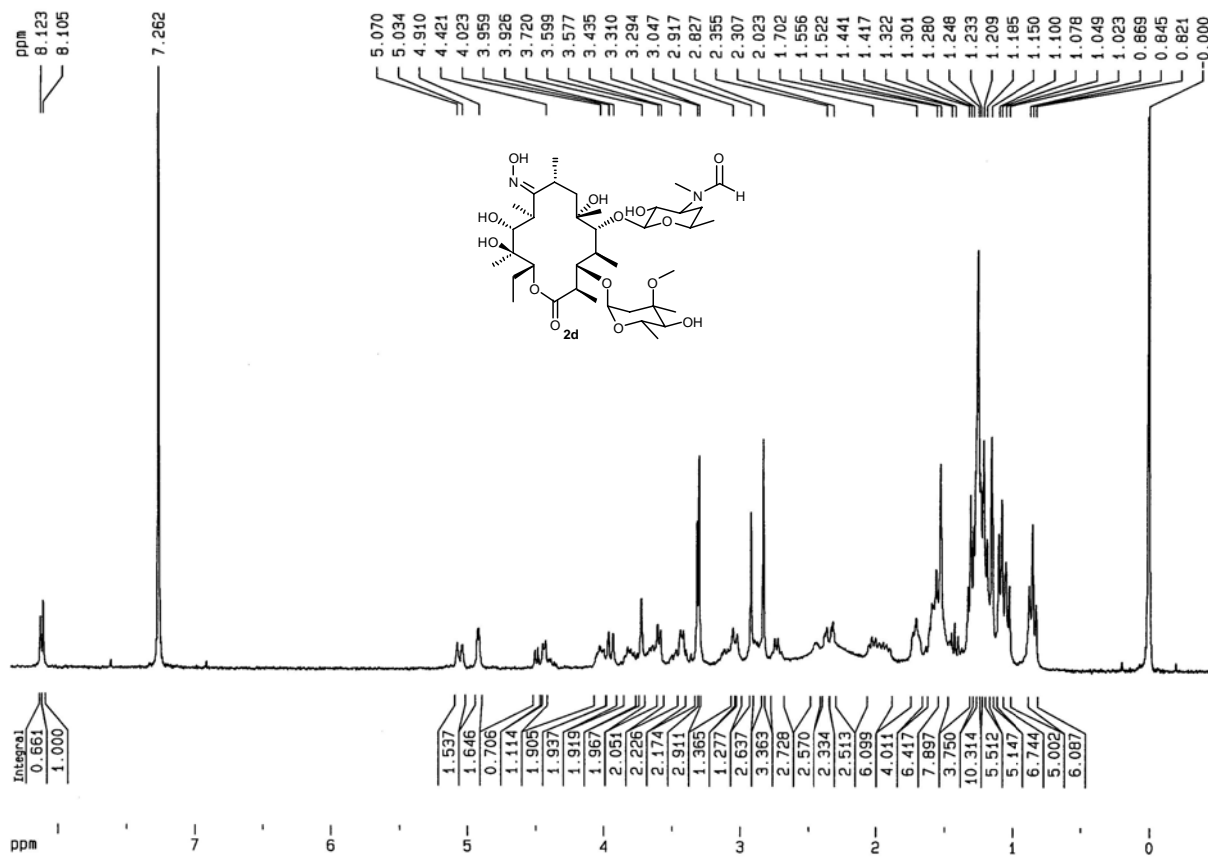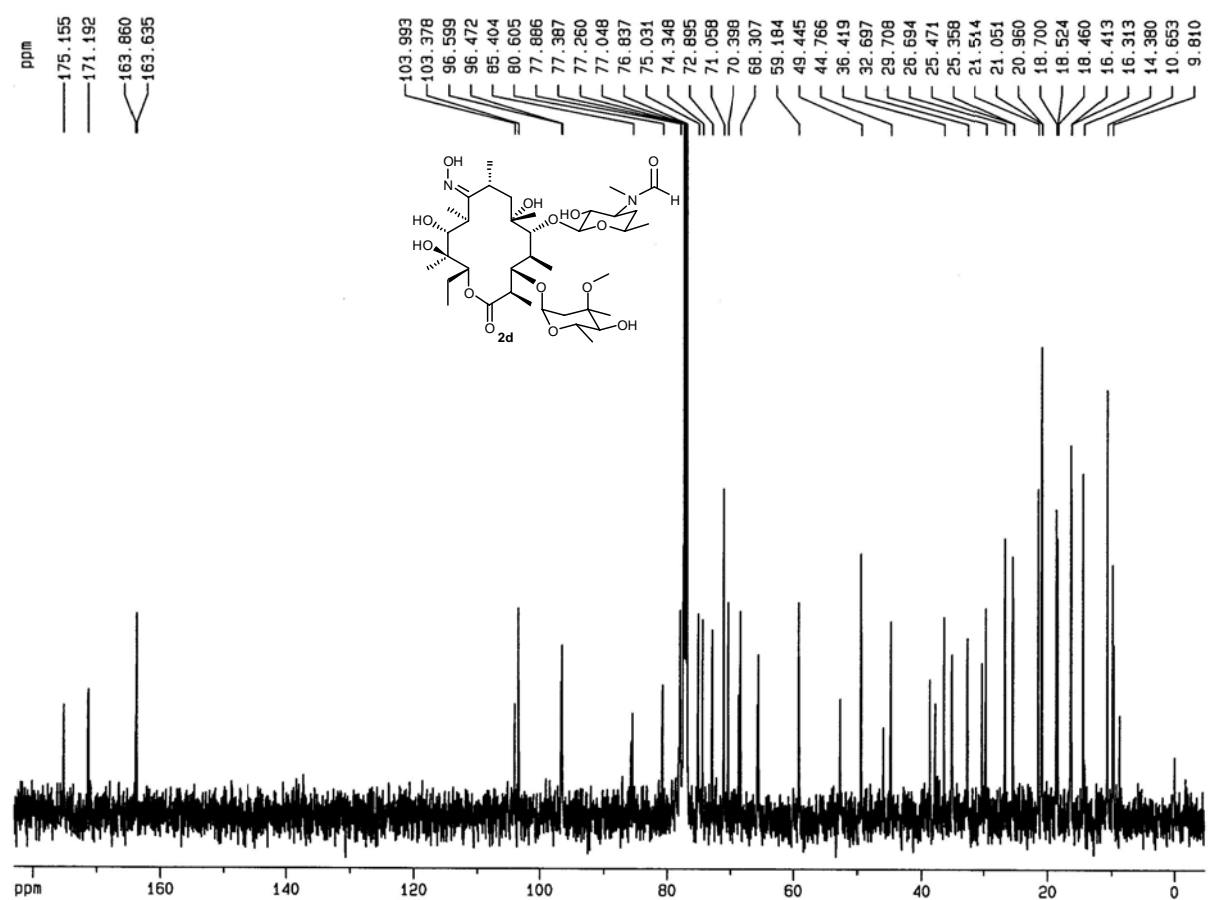

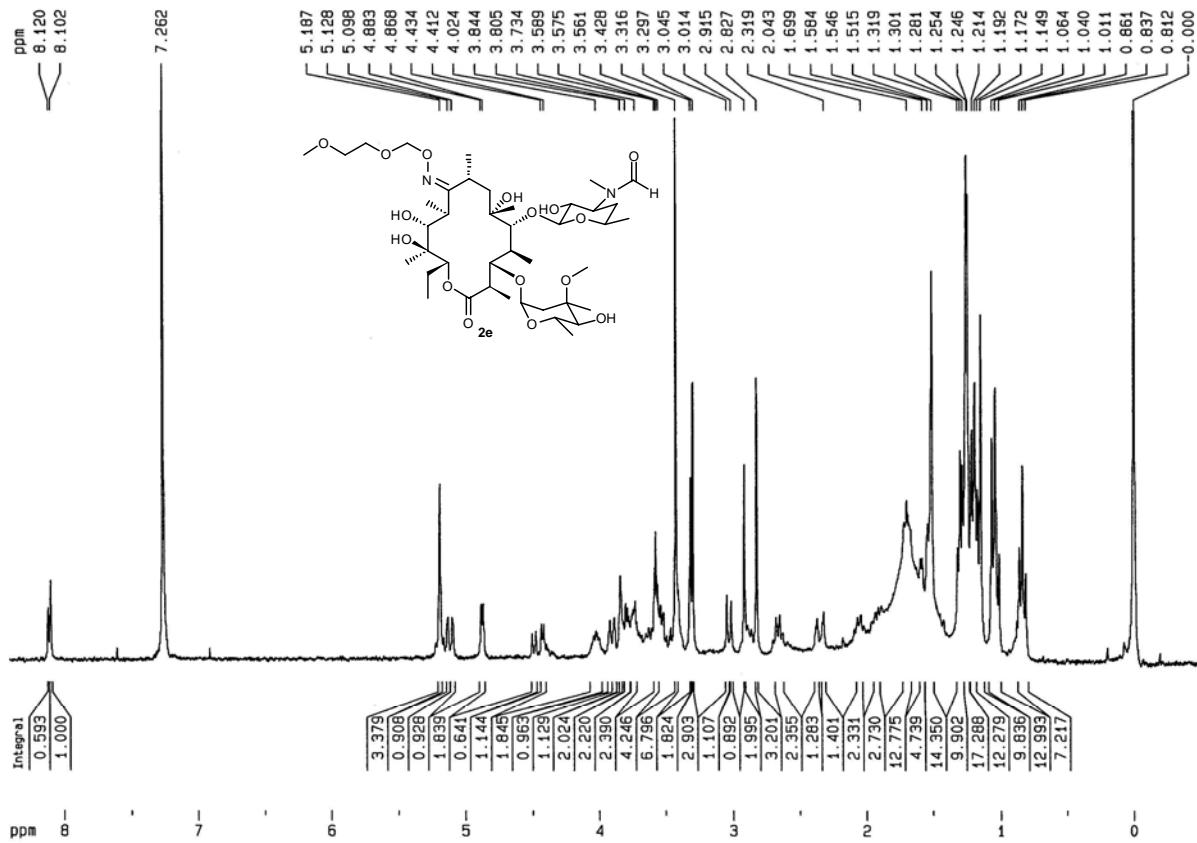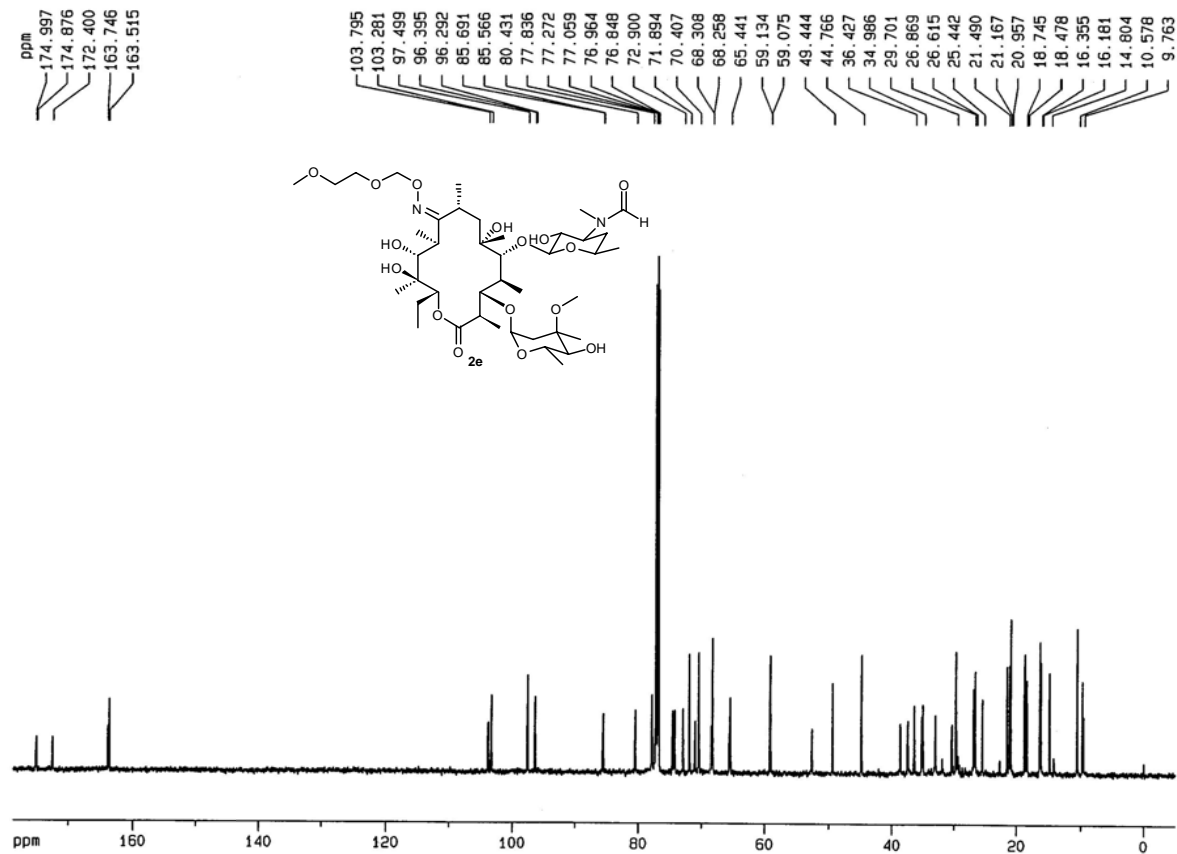

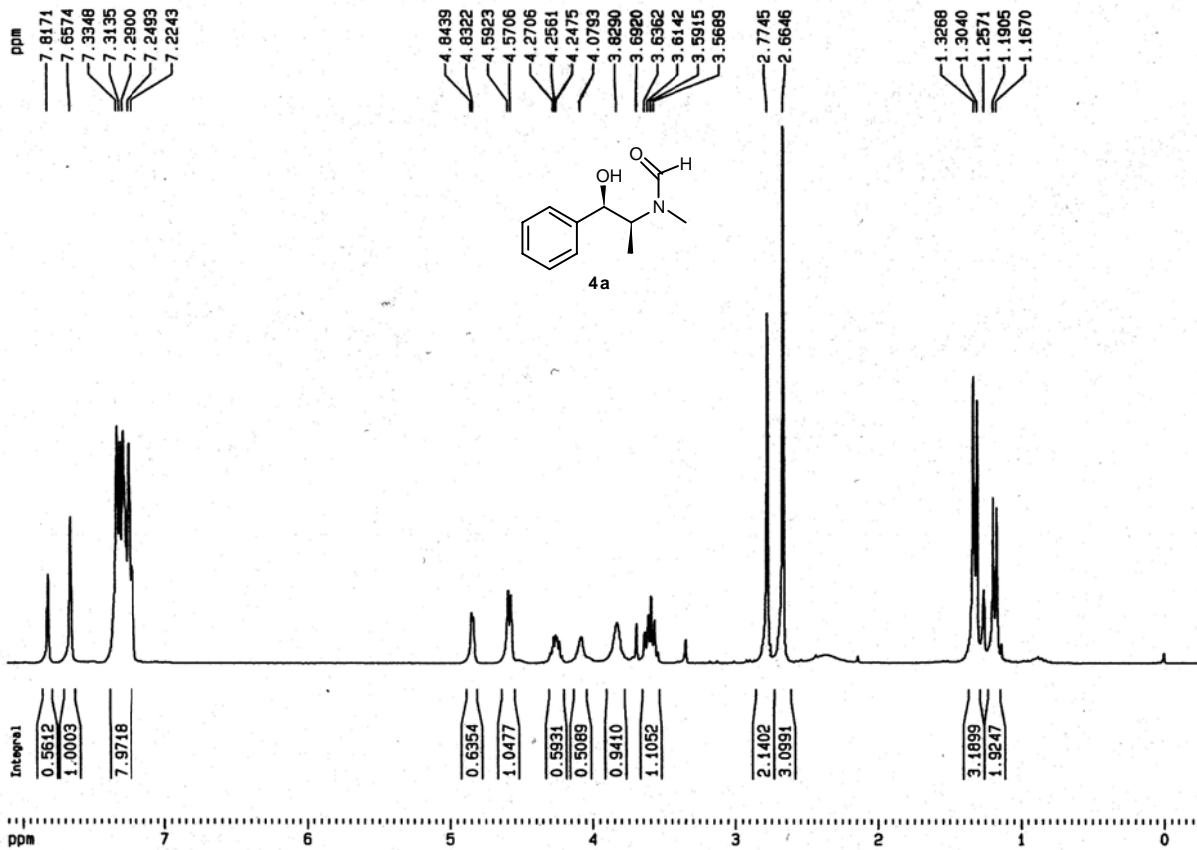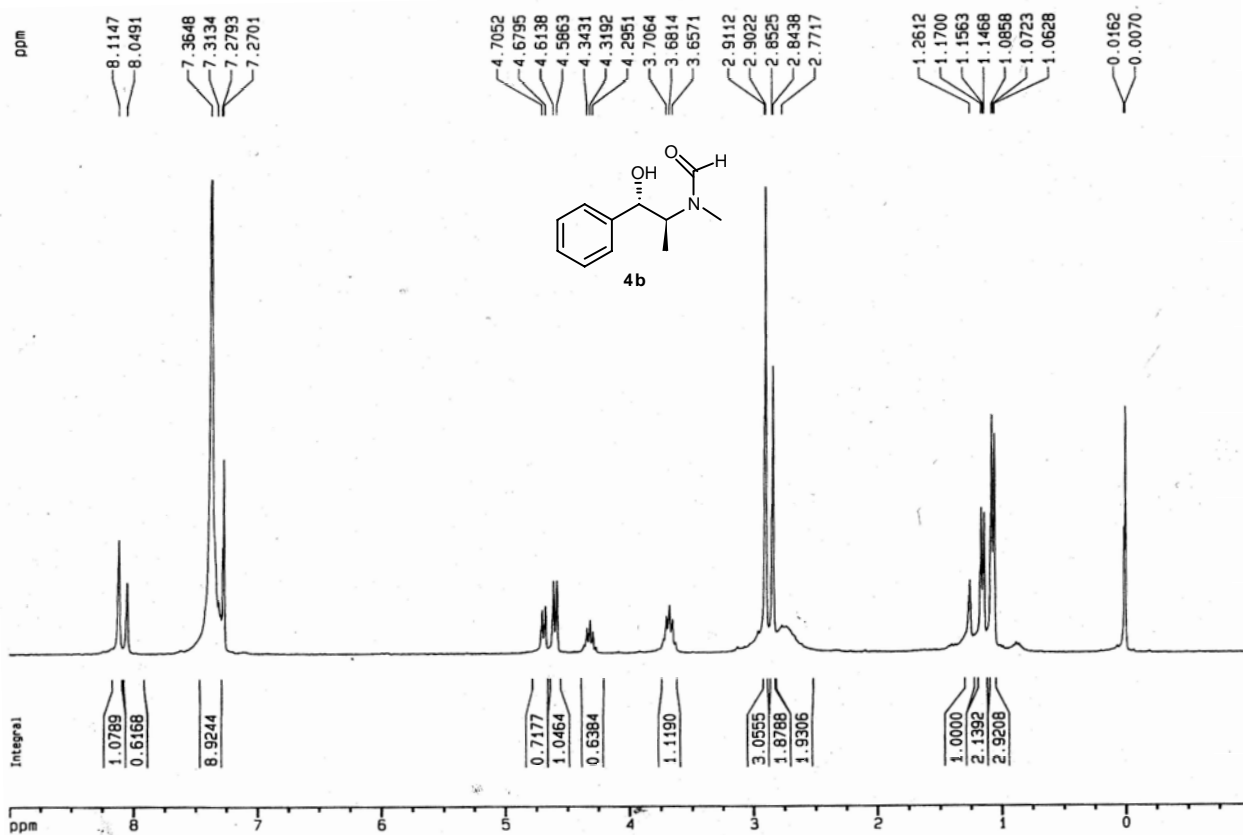

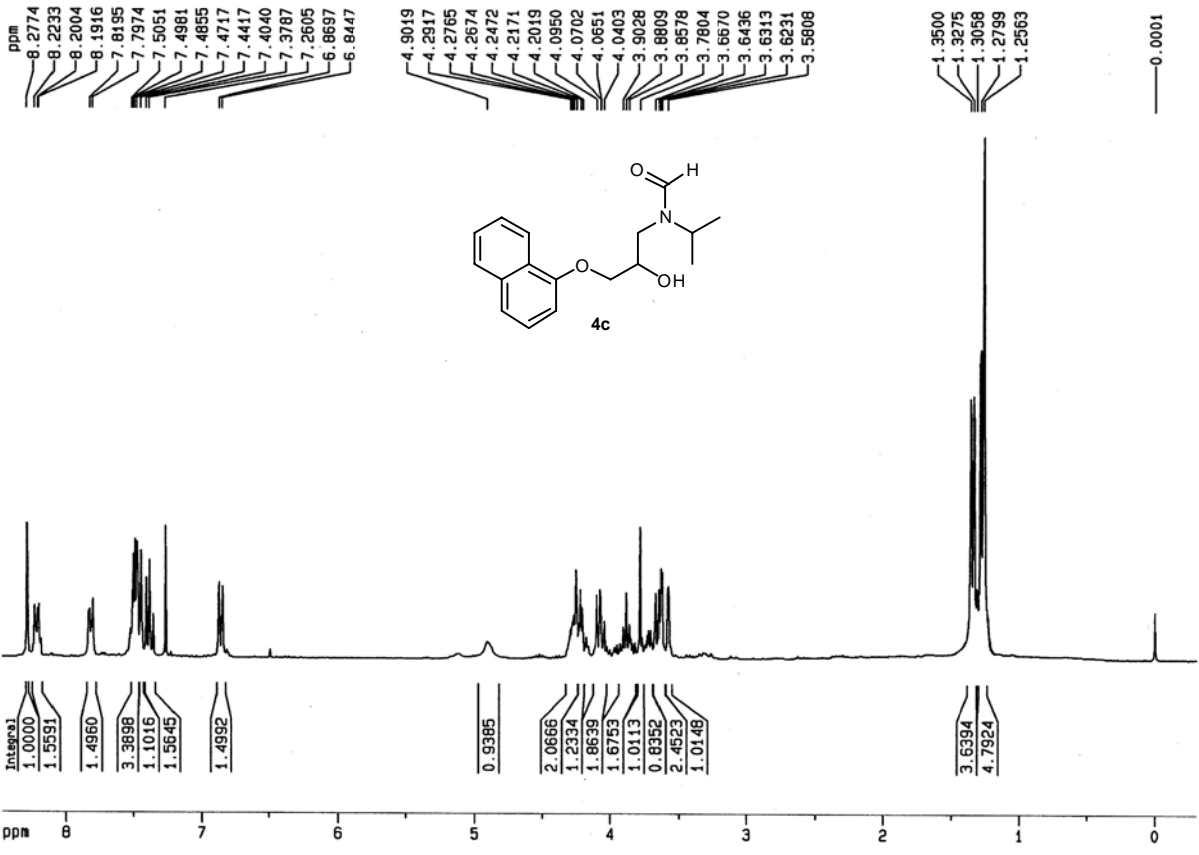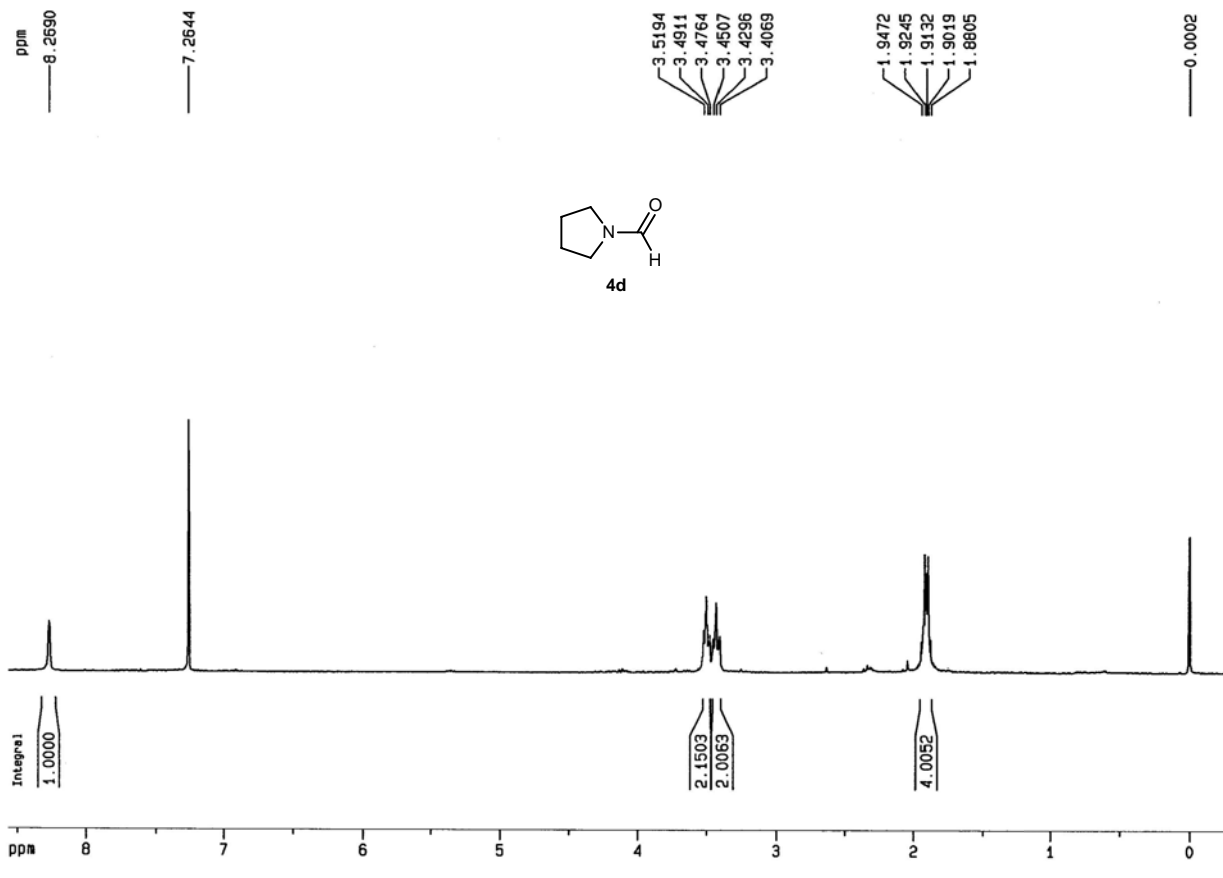

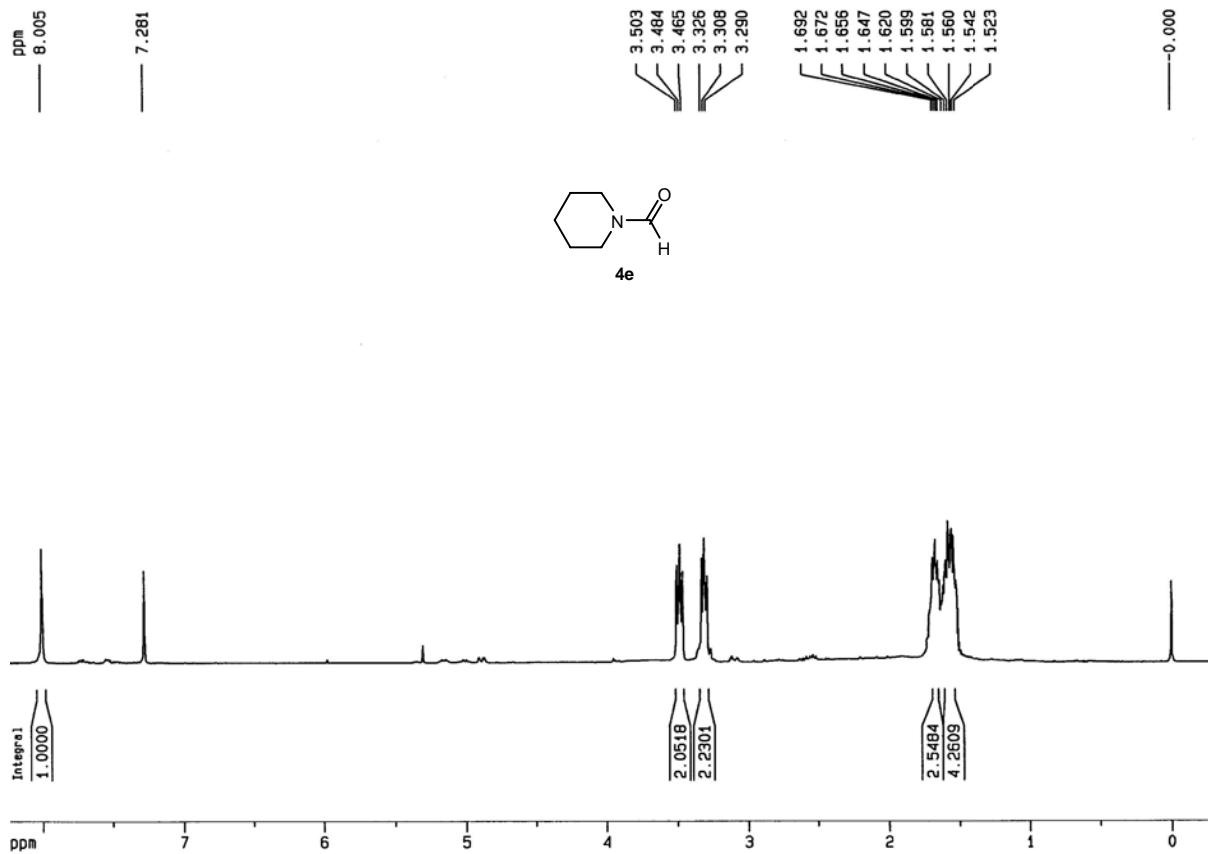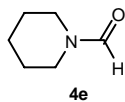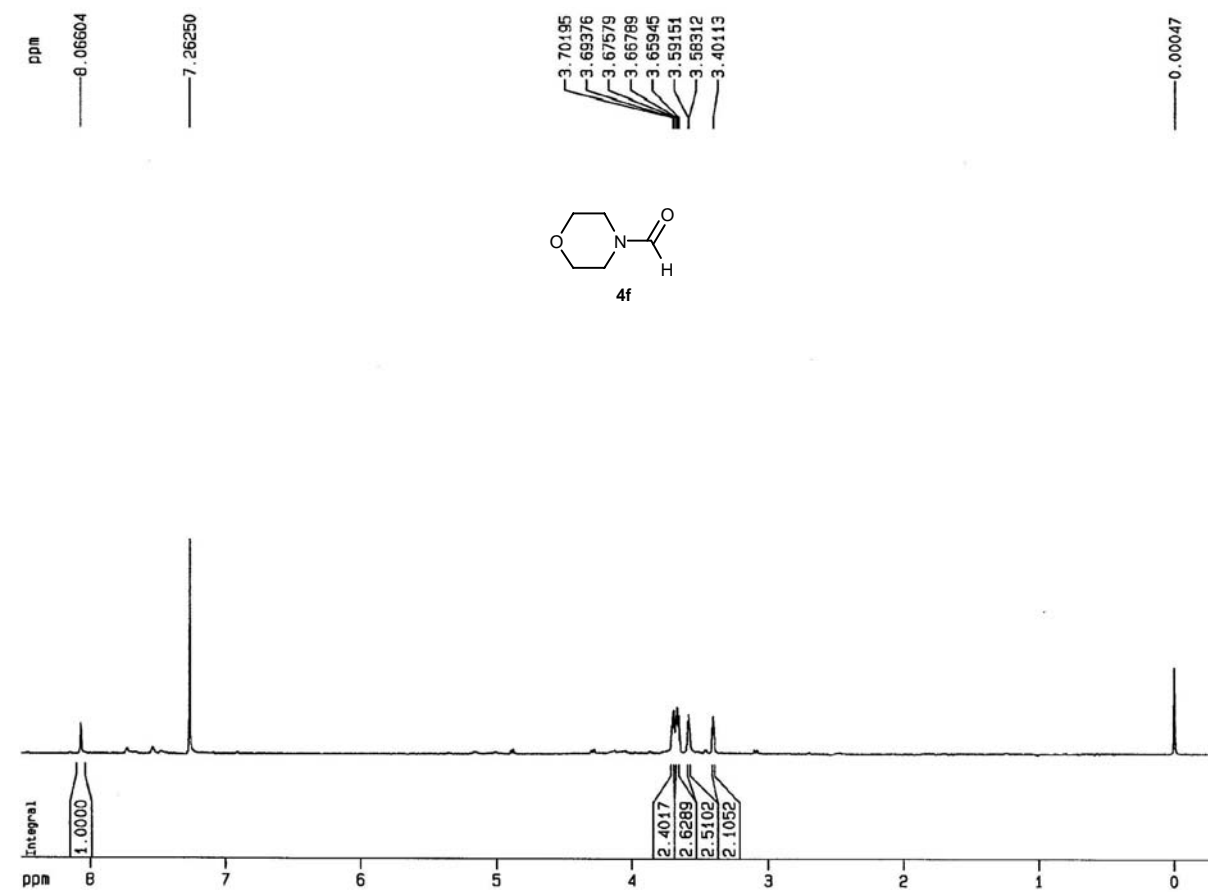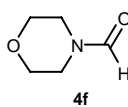

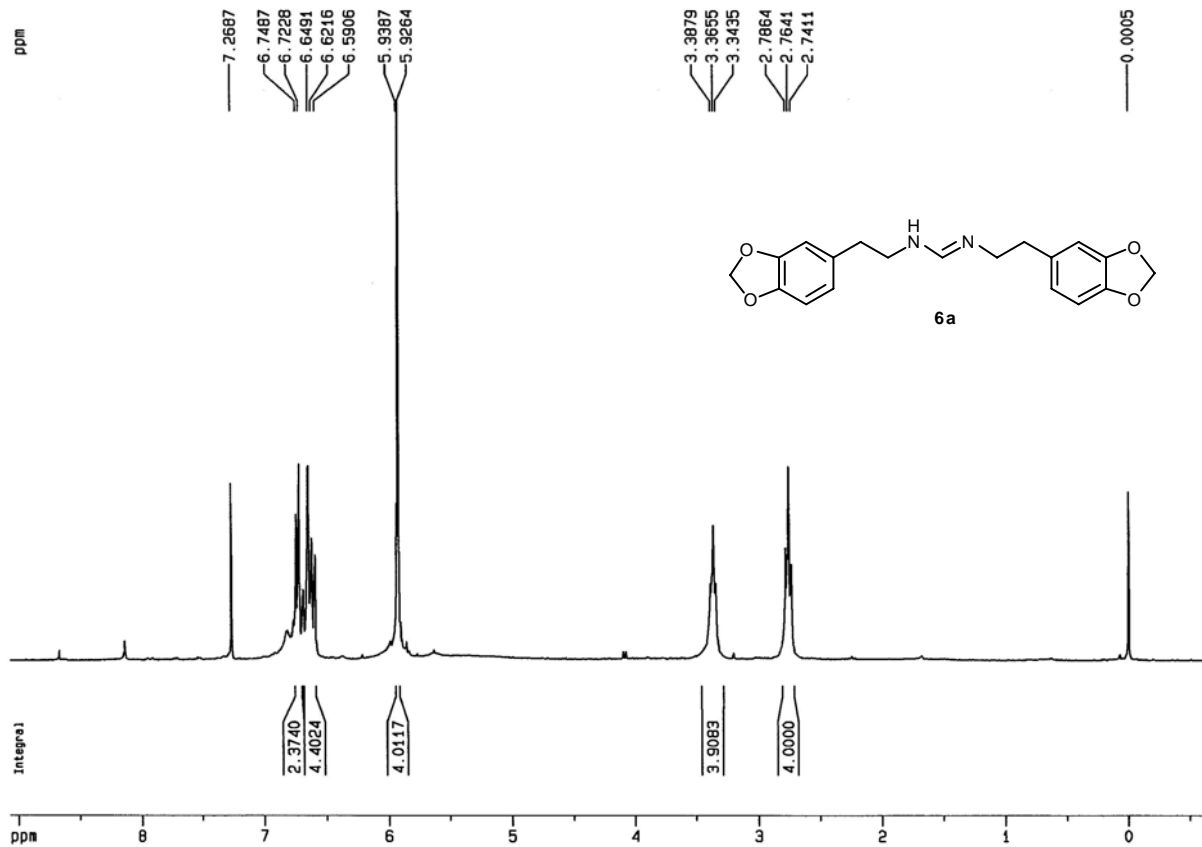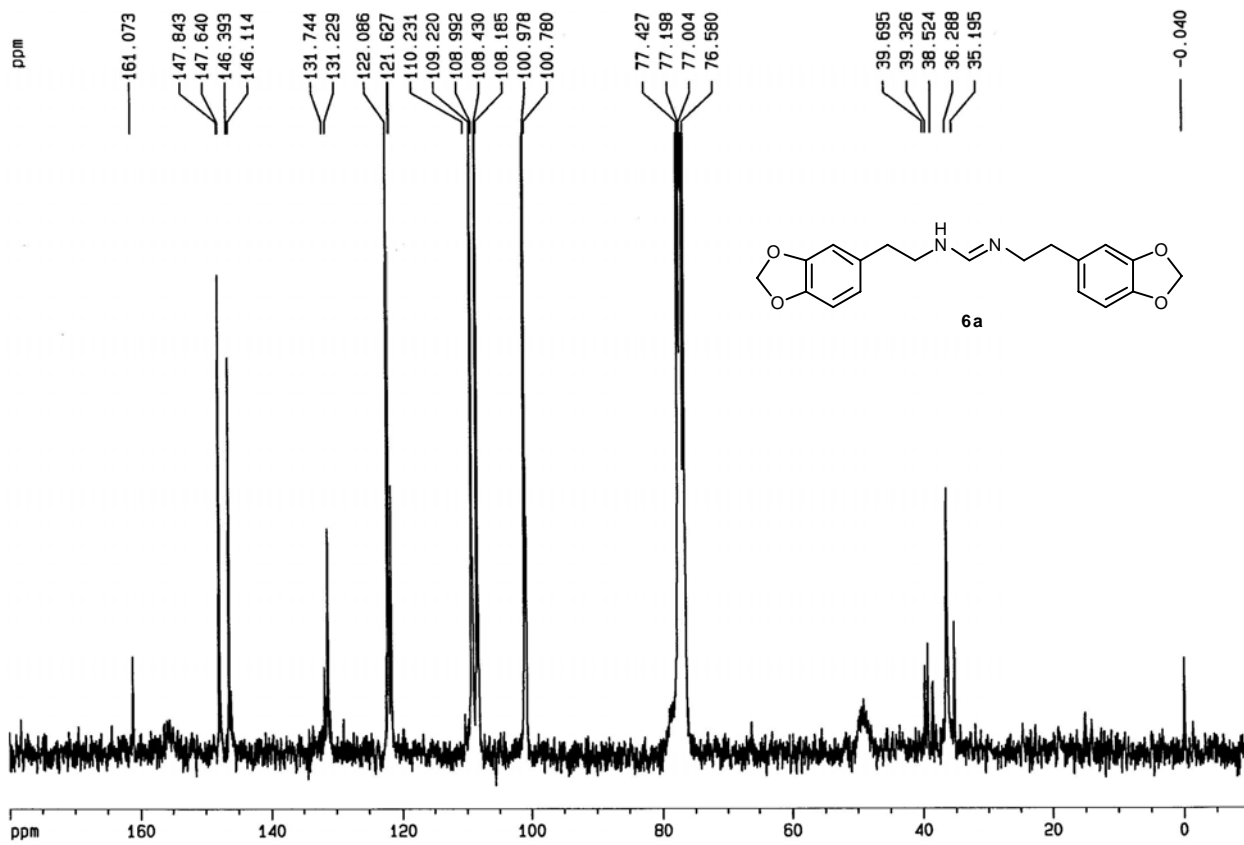



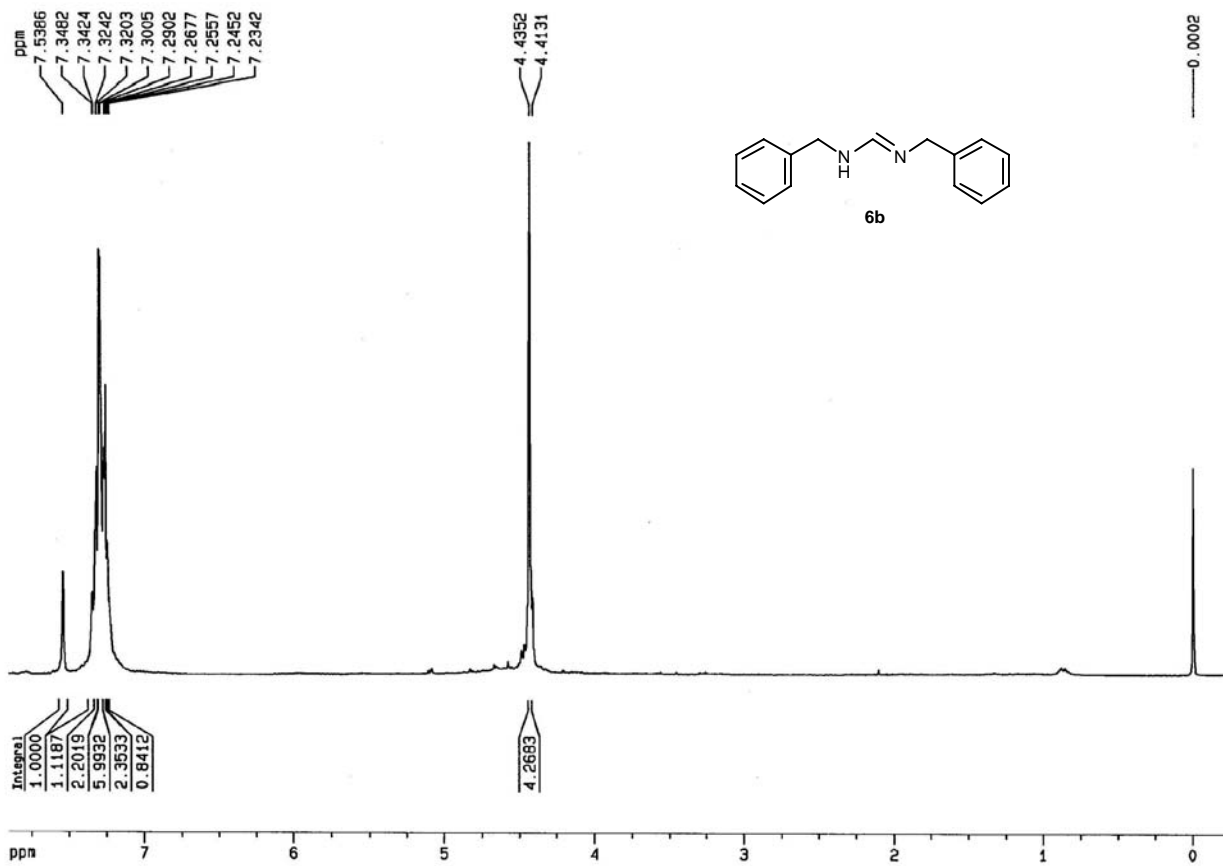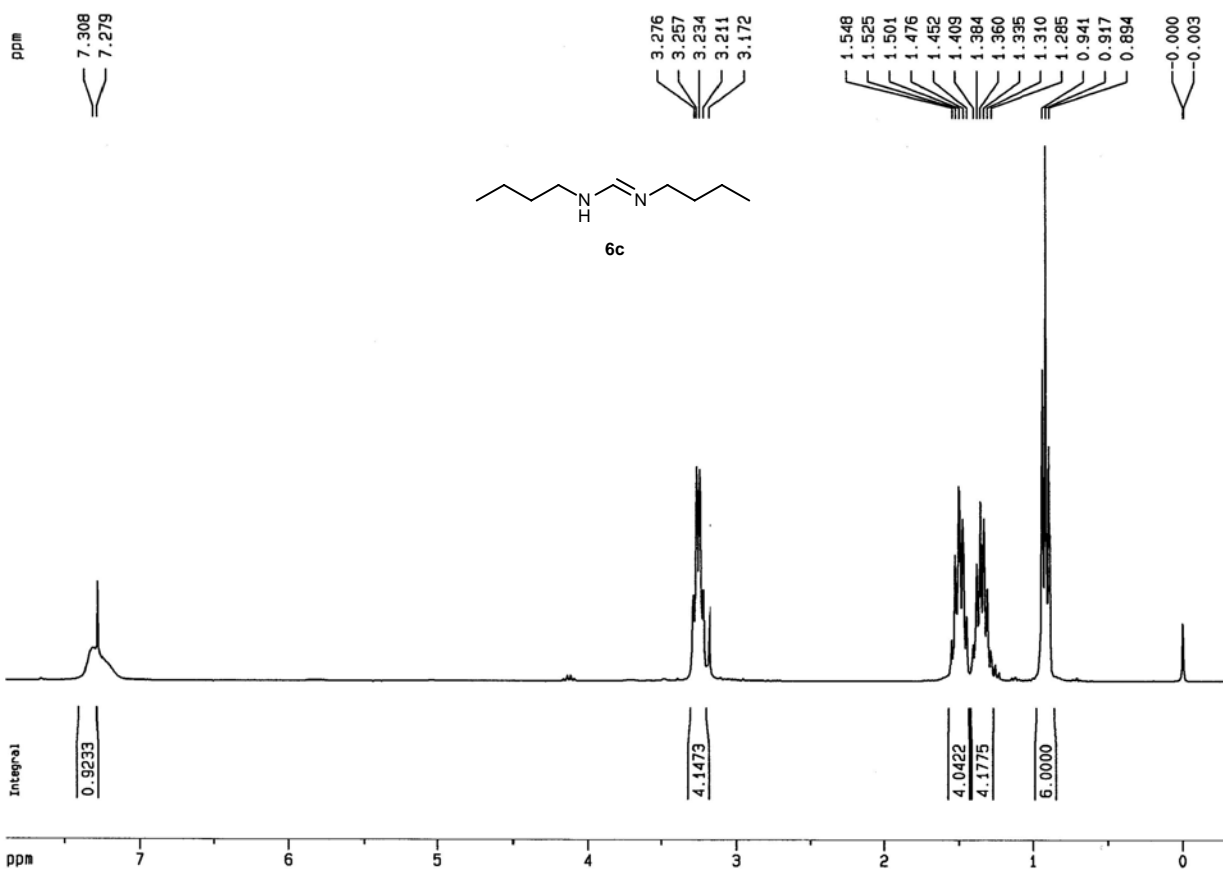

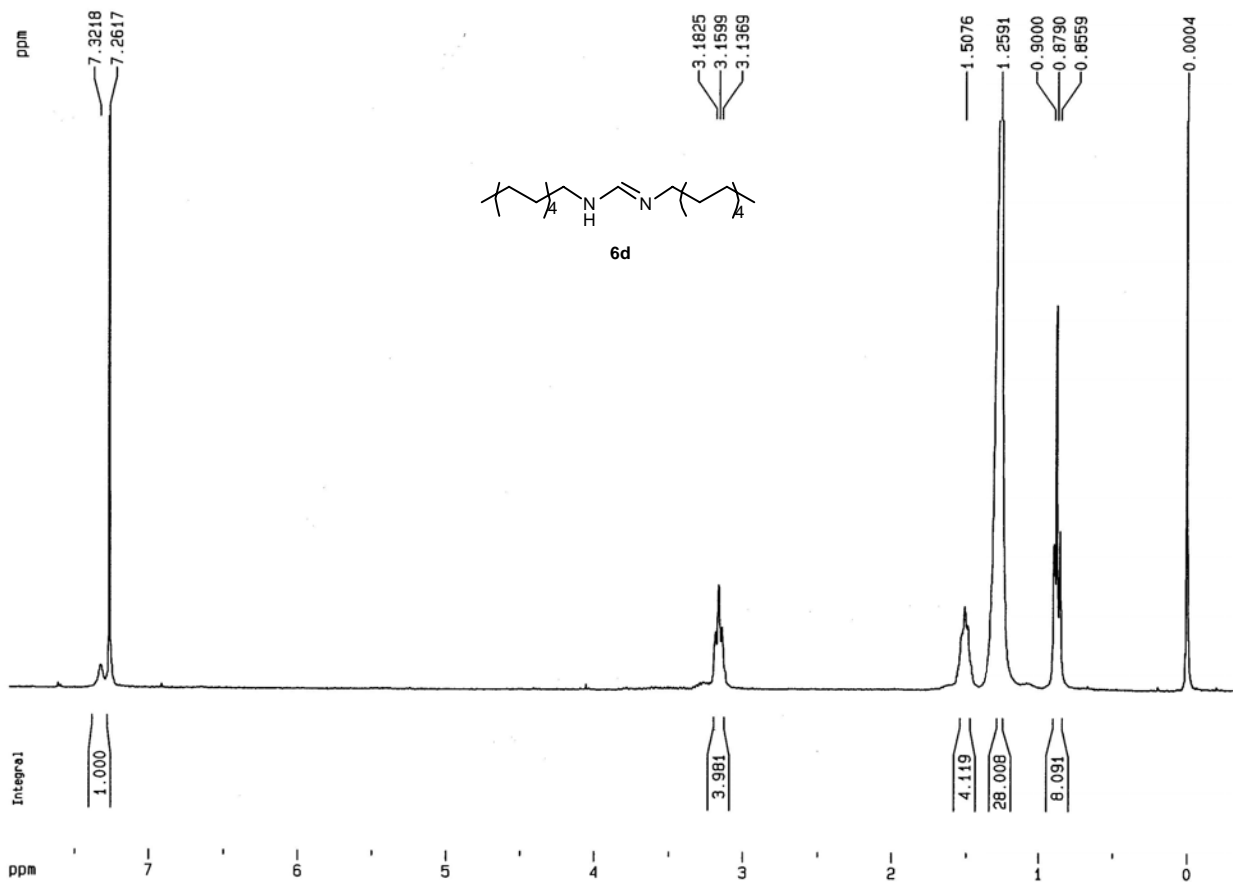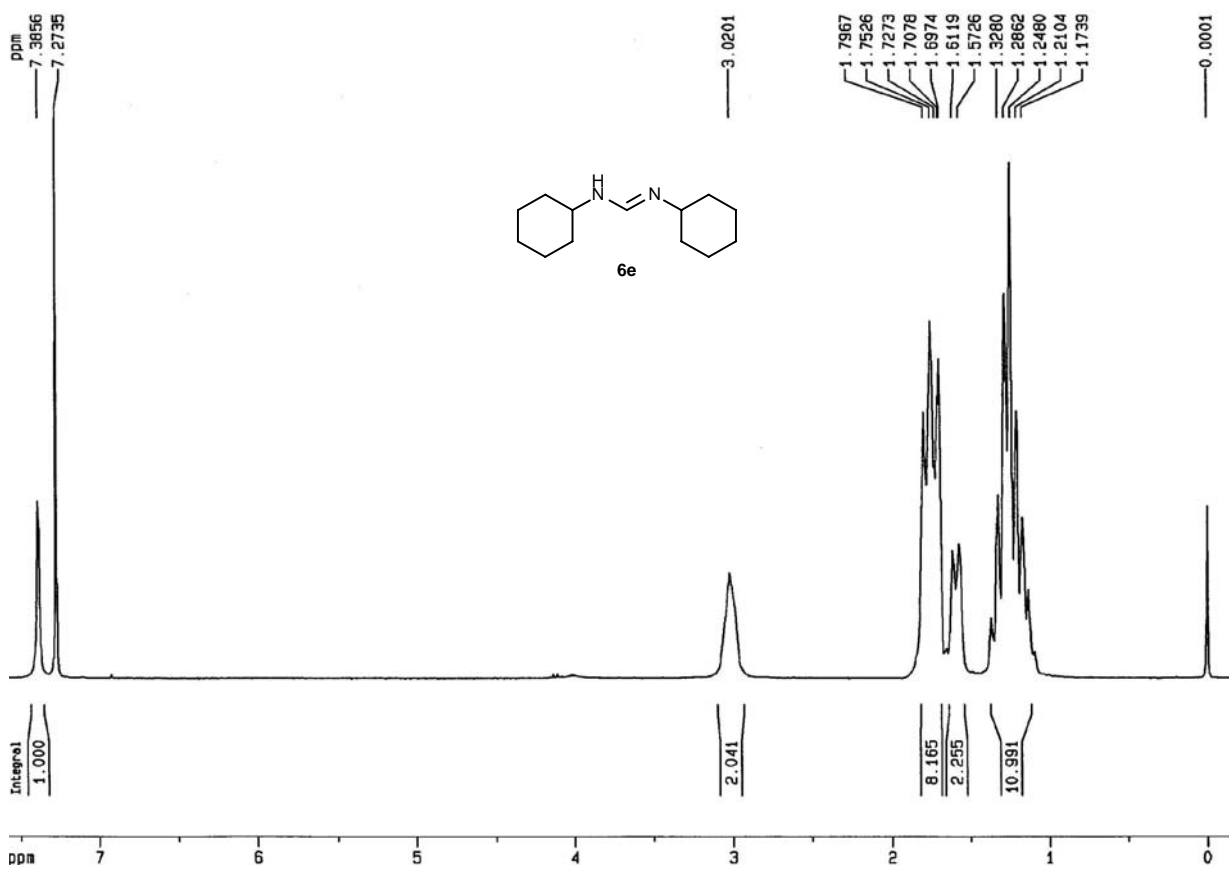

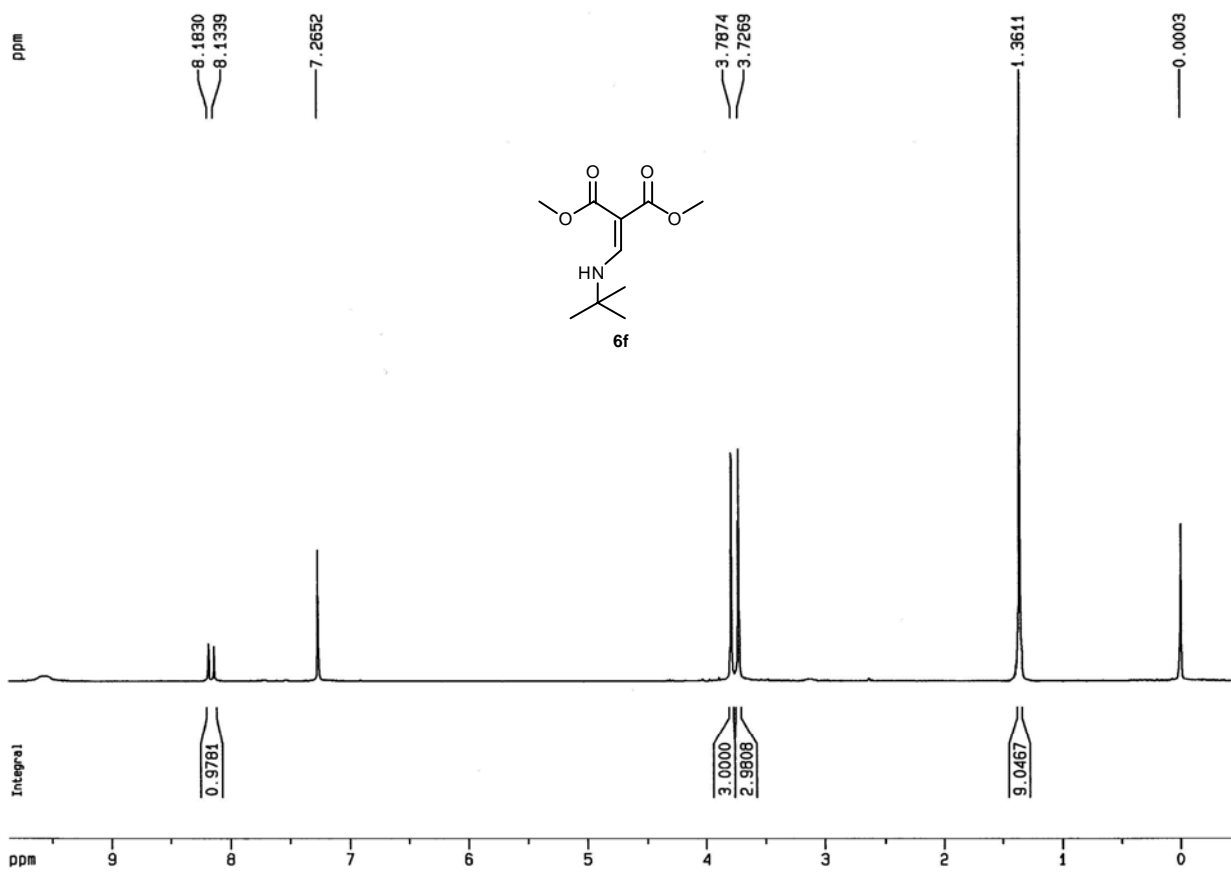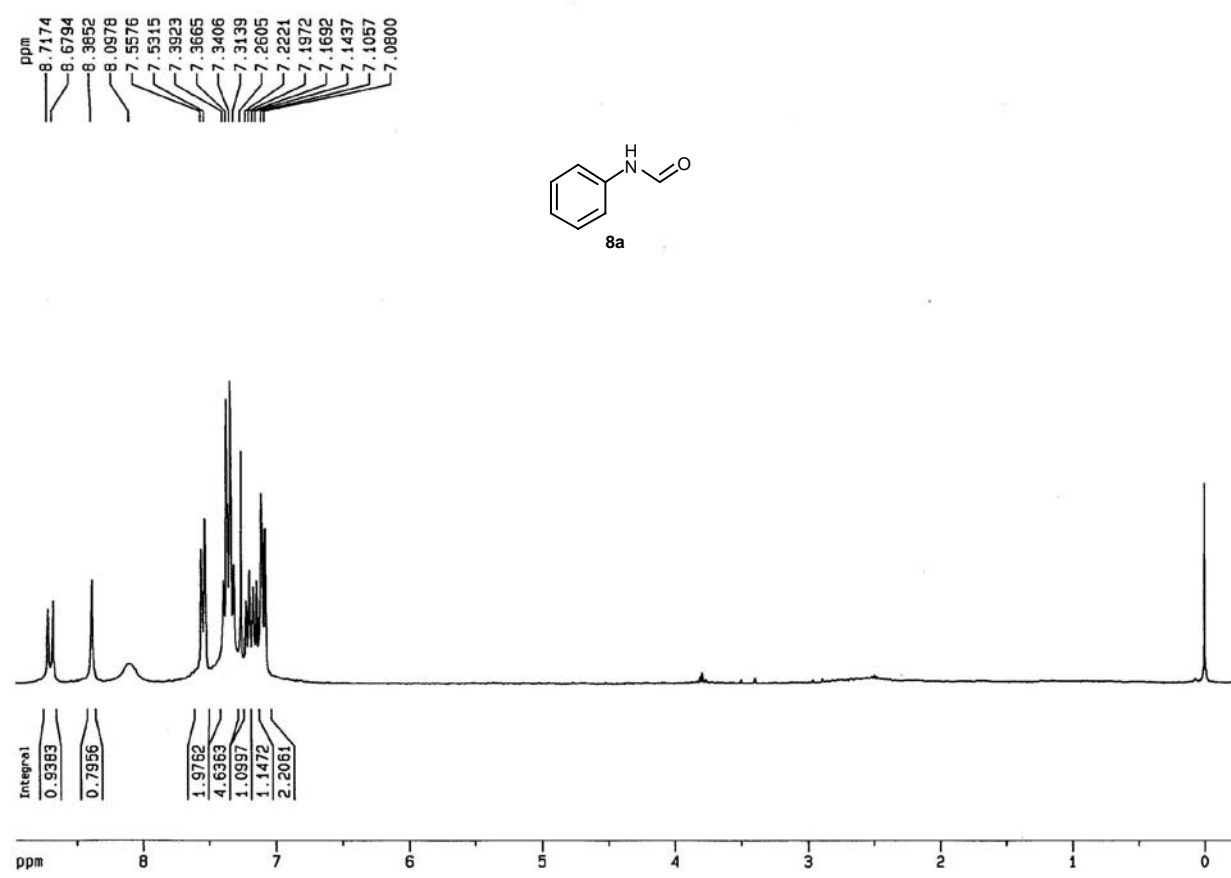

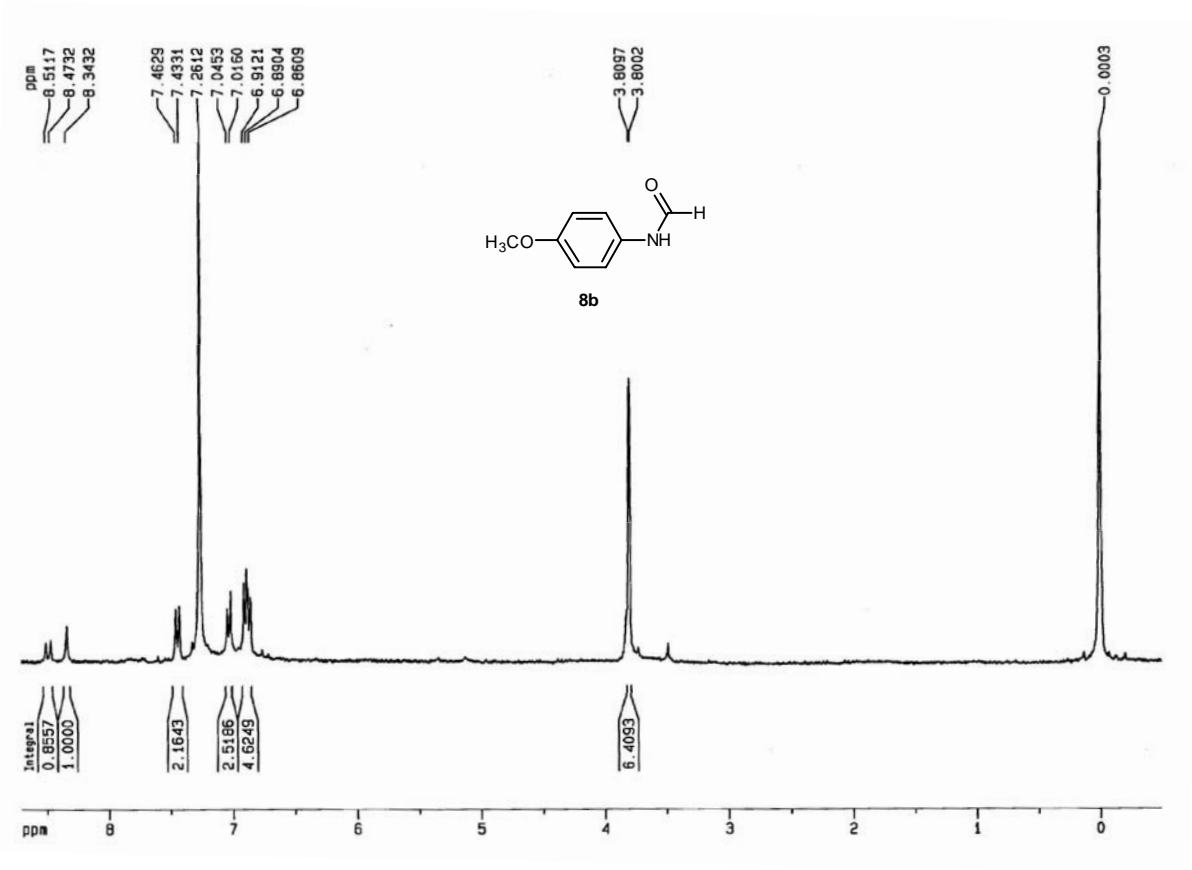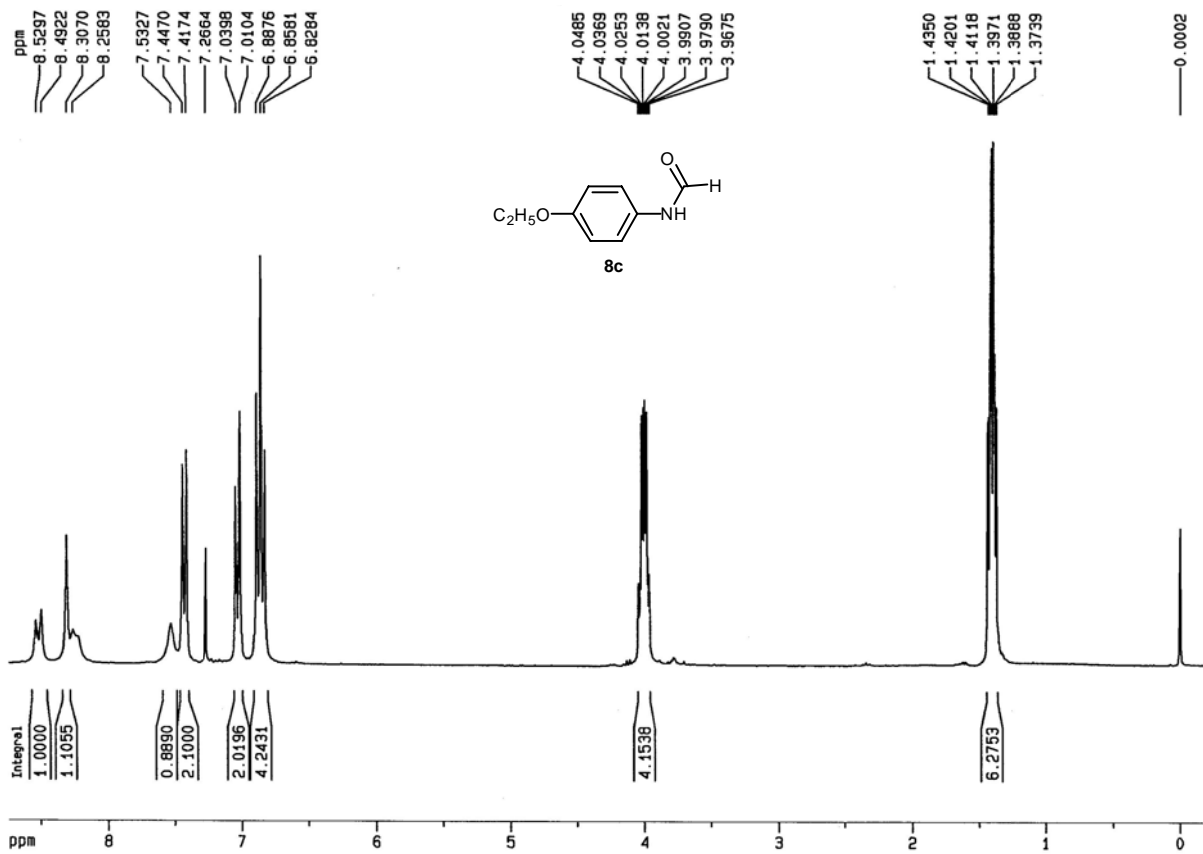

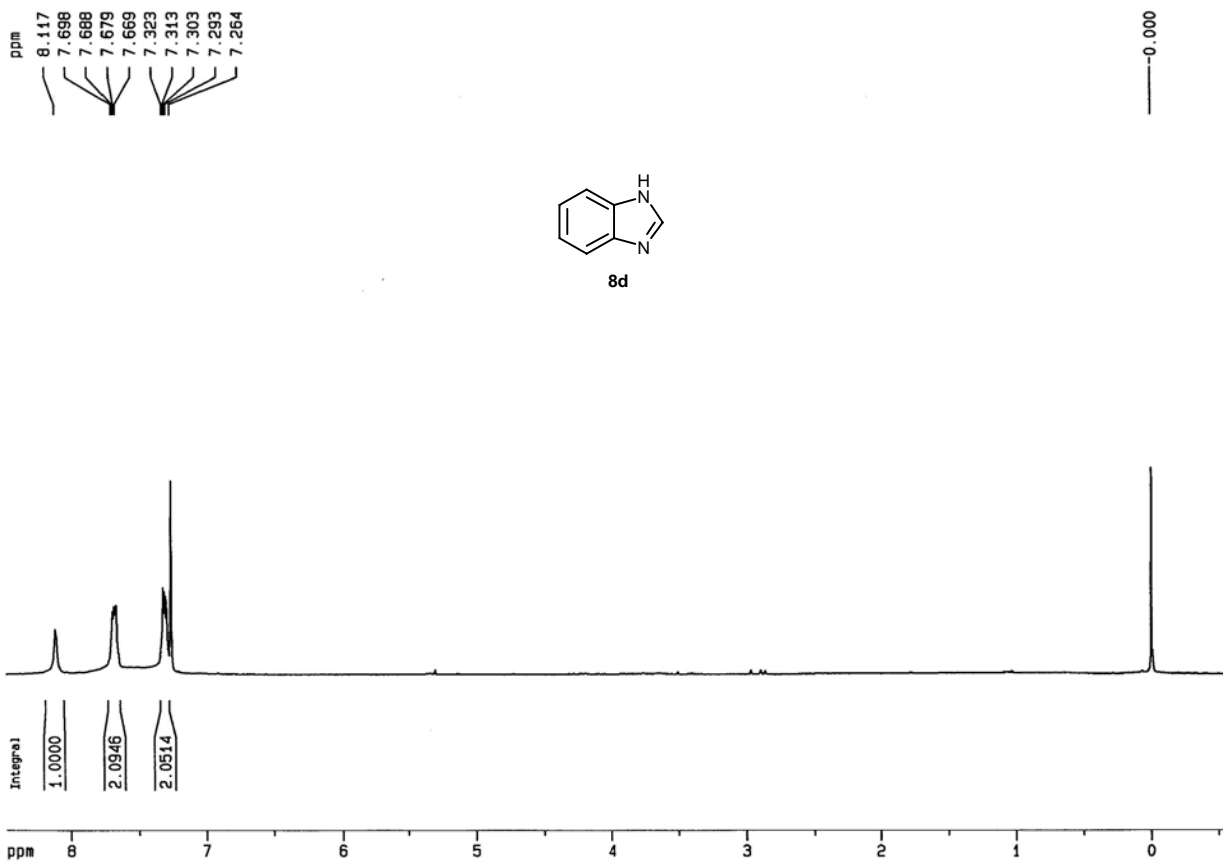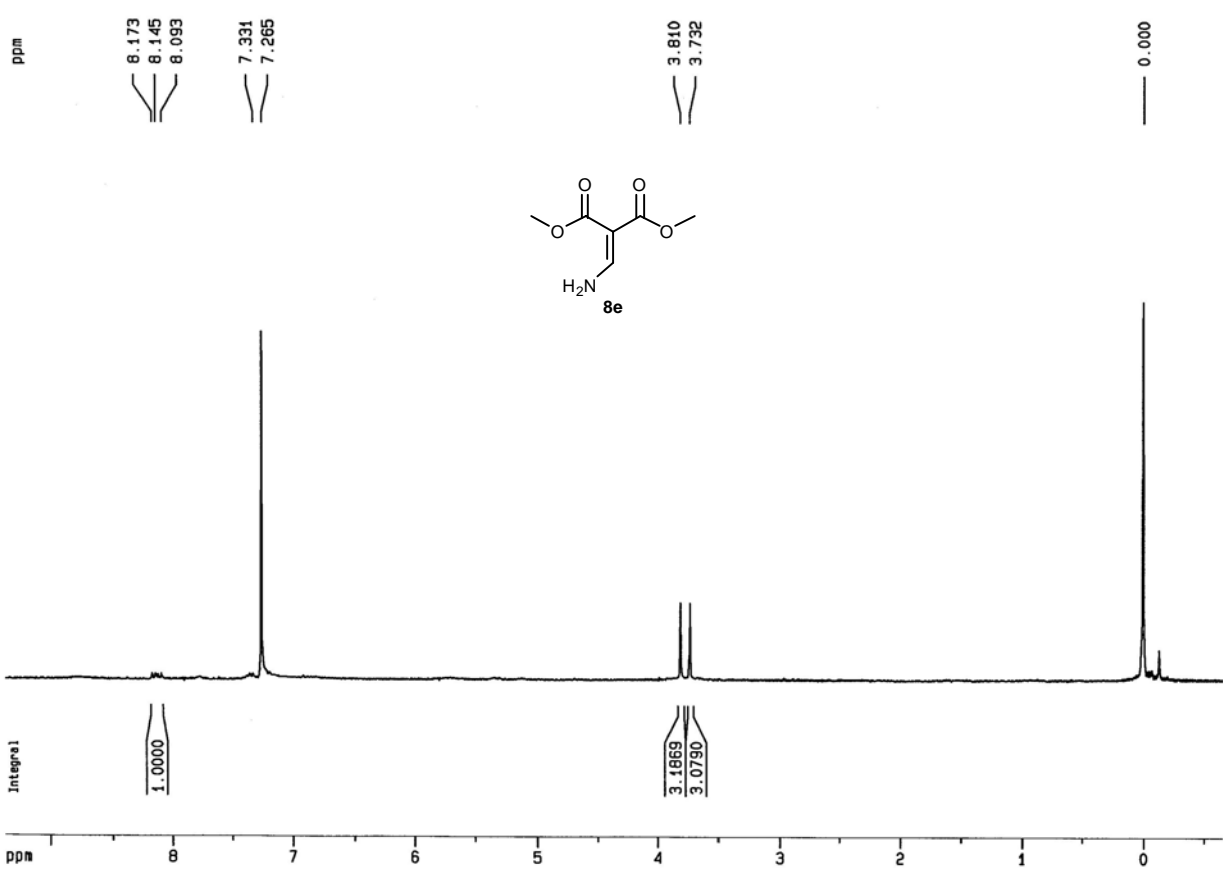

Supplement: b810086a.pdf [file b810086a.pdf]
